# Supplementary material for: MOF-Derived Bimetallic Catalysts for Simultaneous Irradiation Degradation and Hydrogen Evolution: Synergistic Oxidation-Reduction Processes
Source: Research Square preprint supplement (doi:10.21203/rs.3.rs-6876542/v1), 2025-06-27
Supplement: Supplementary file 1 [file 4f64b74276a20e2a3624d0ab.docx]

**Supporting Information**

MOF-Derived Bimetallic Catalysts for Simultaneous Irradiation Degradation and Hydrogen Evolution: Synergistic Oxidation-Reduction Processes

Yaqi Wub, Yalan Denga, Haipeng Xiaoa, Ruowen Maa, Liuxuan Caoa, c, *, Huifang Miao a, c, *, Zhongqun Tianb and Wei Guod, *

a. College of Energy, Xiamen University, Xiamen 361005, PR China.

b.College of Chemistry and Chemical Engineering, Xiamen University, Xiamen 361005, PR China.

c Fujian Research Center for Nuclear Engineering, Xiamen, Fujian 361005, PR China.

d. Biosafety Research Center Yangtze River Delta in Zhangjiagang, Suzhou 215611, People’s Republic of China.

Corresponding Author

E-mail address: caoliuxuan@xmu.edu.cn (Liuxuan Cao), hfmiao@xmu.edu.cn (Huifang Miao), wguo@iccas.ac.cn (Wei Guo)

Figure:


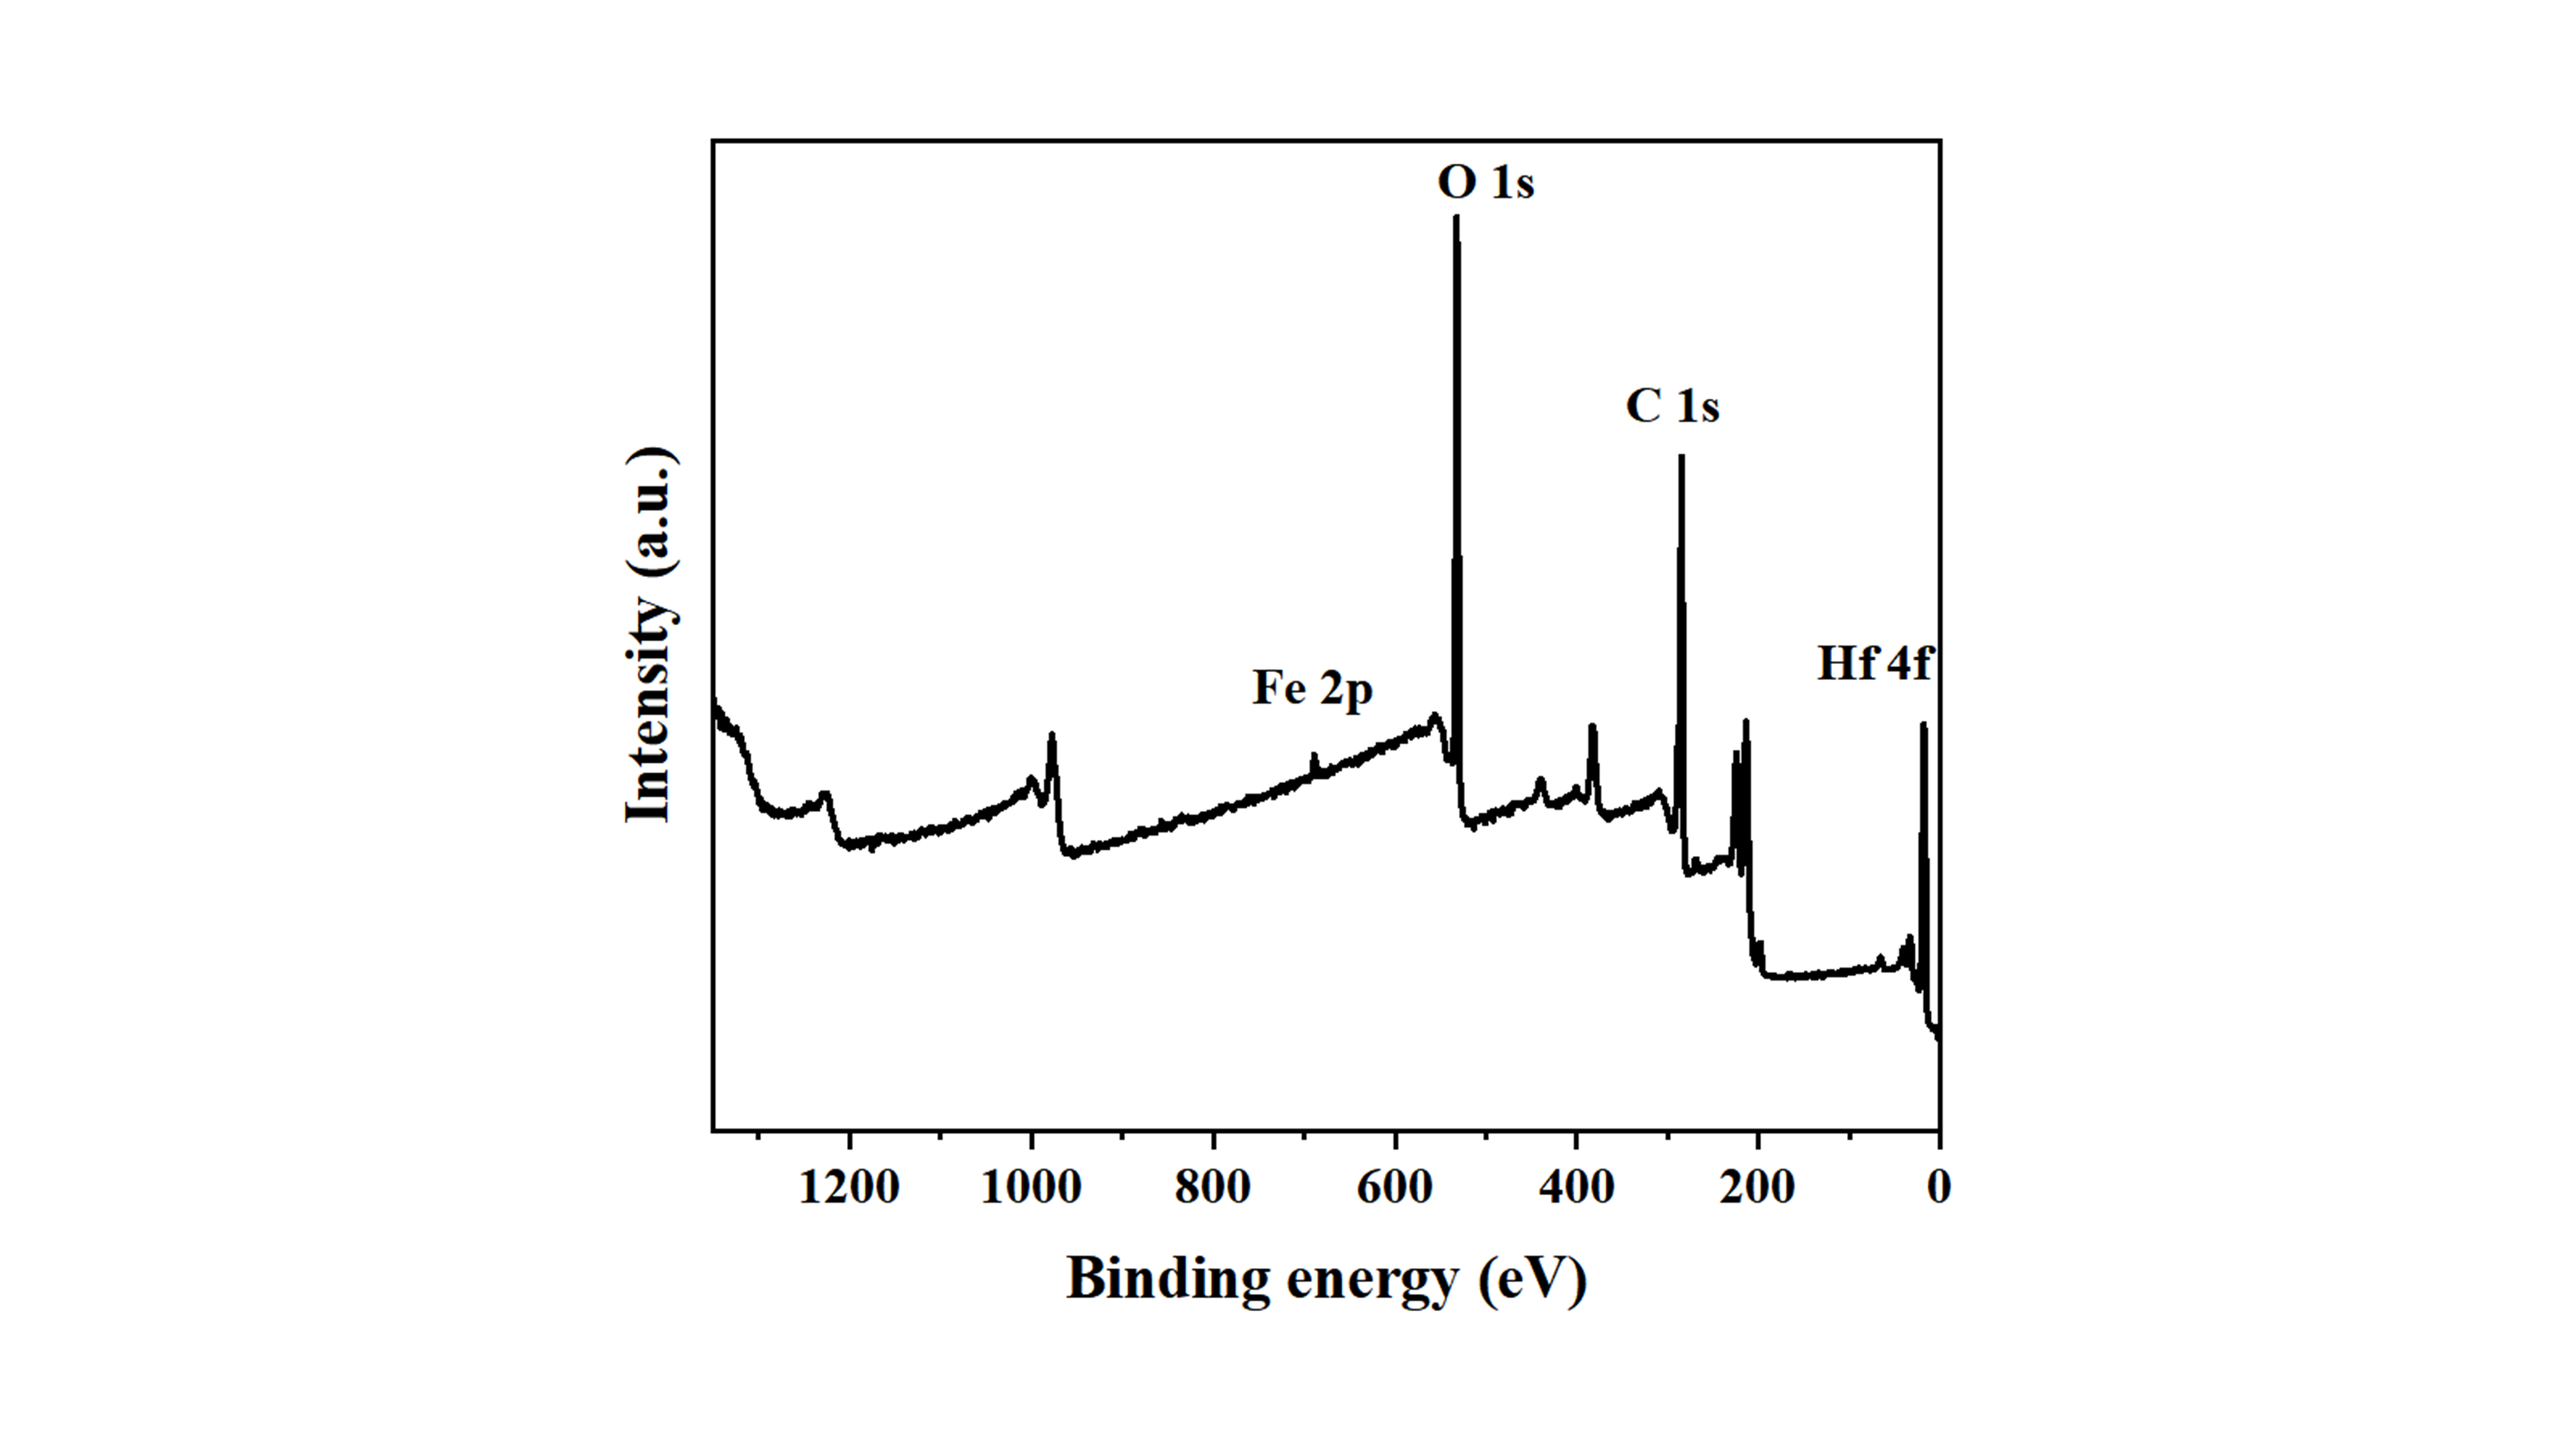


Figure S1. The XPS full spectrum of UIF material.


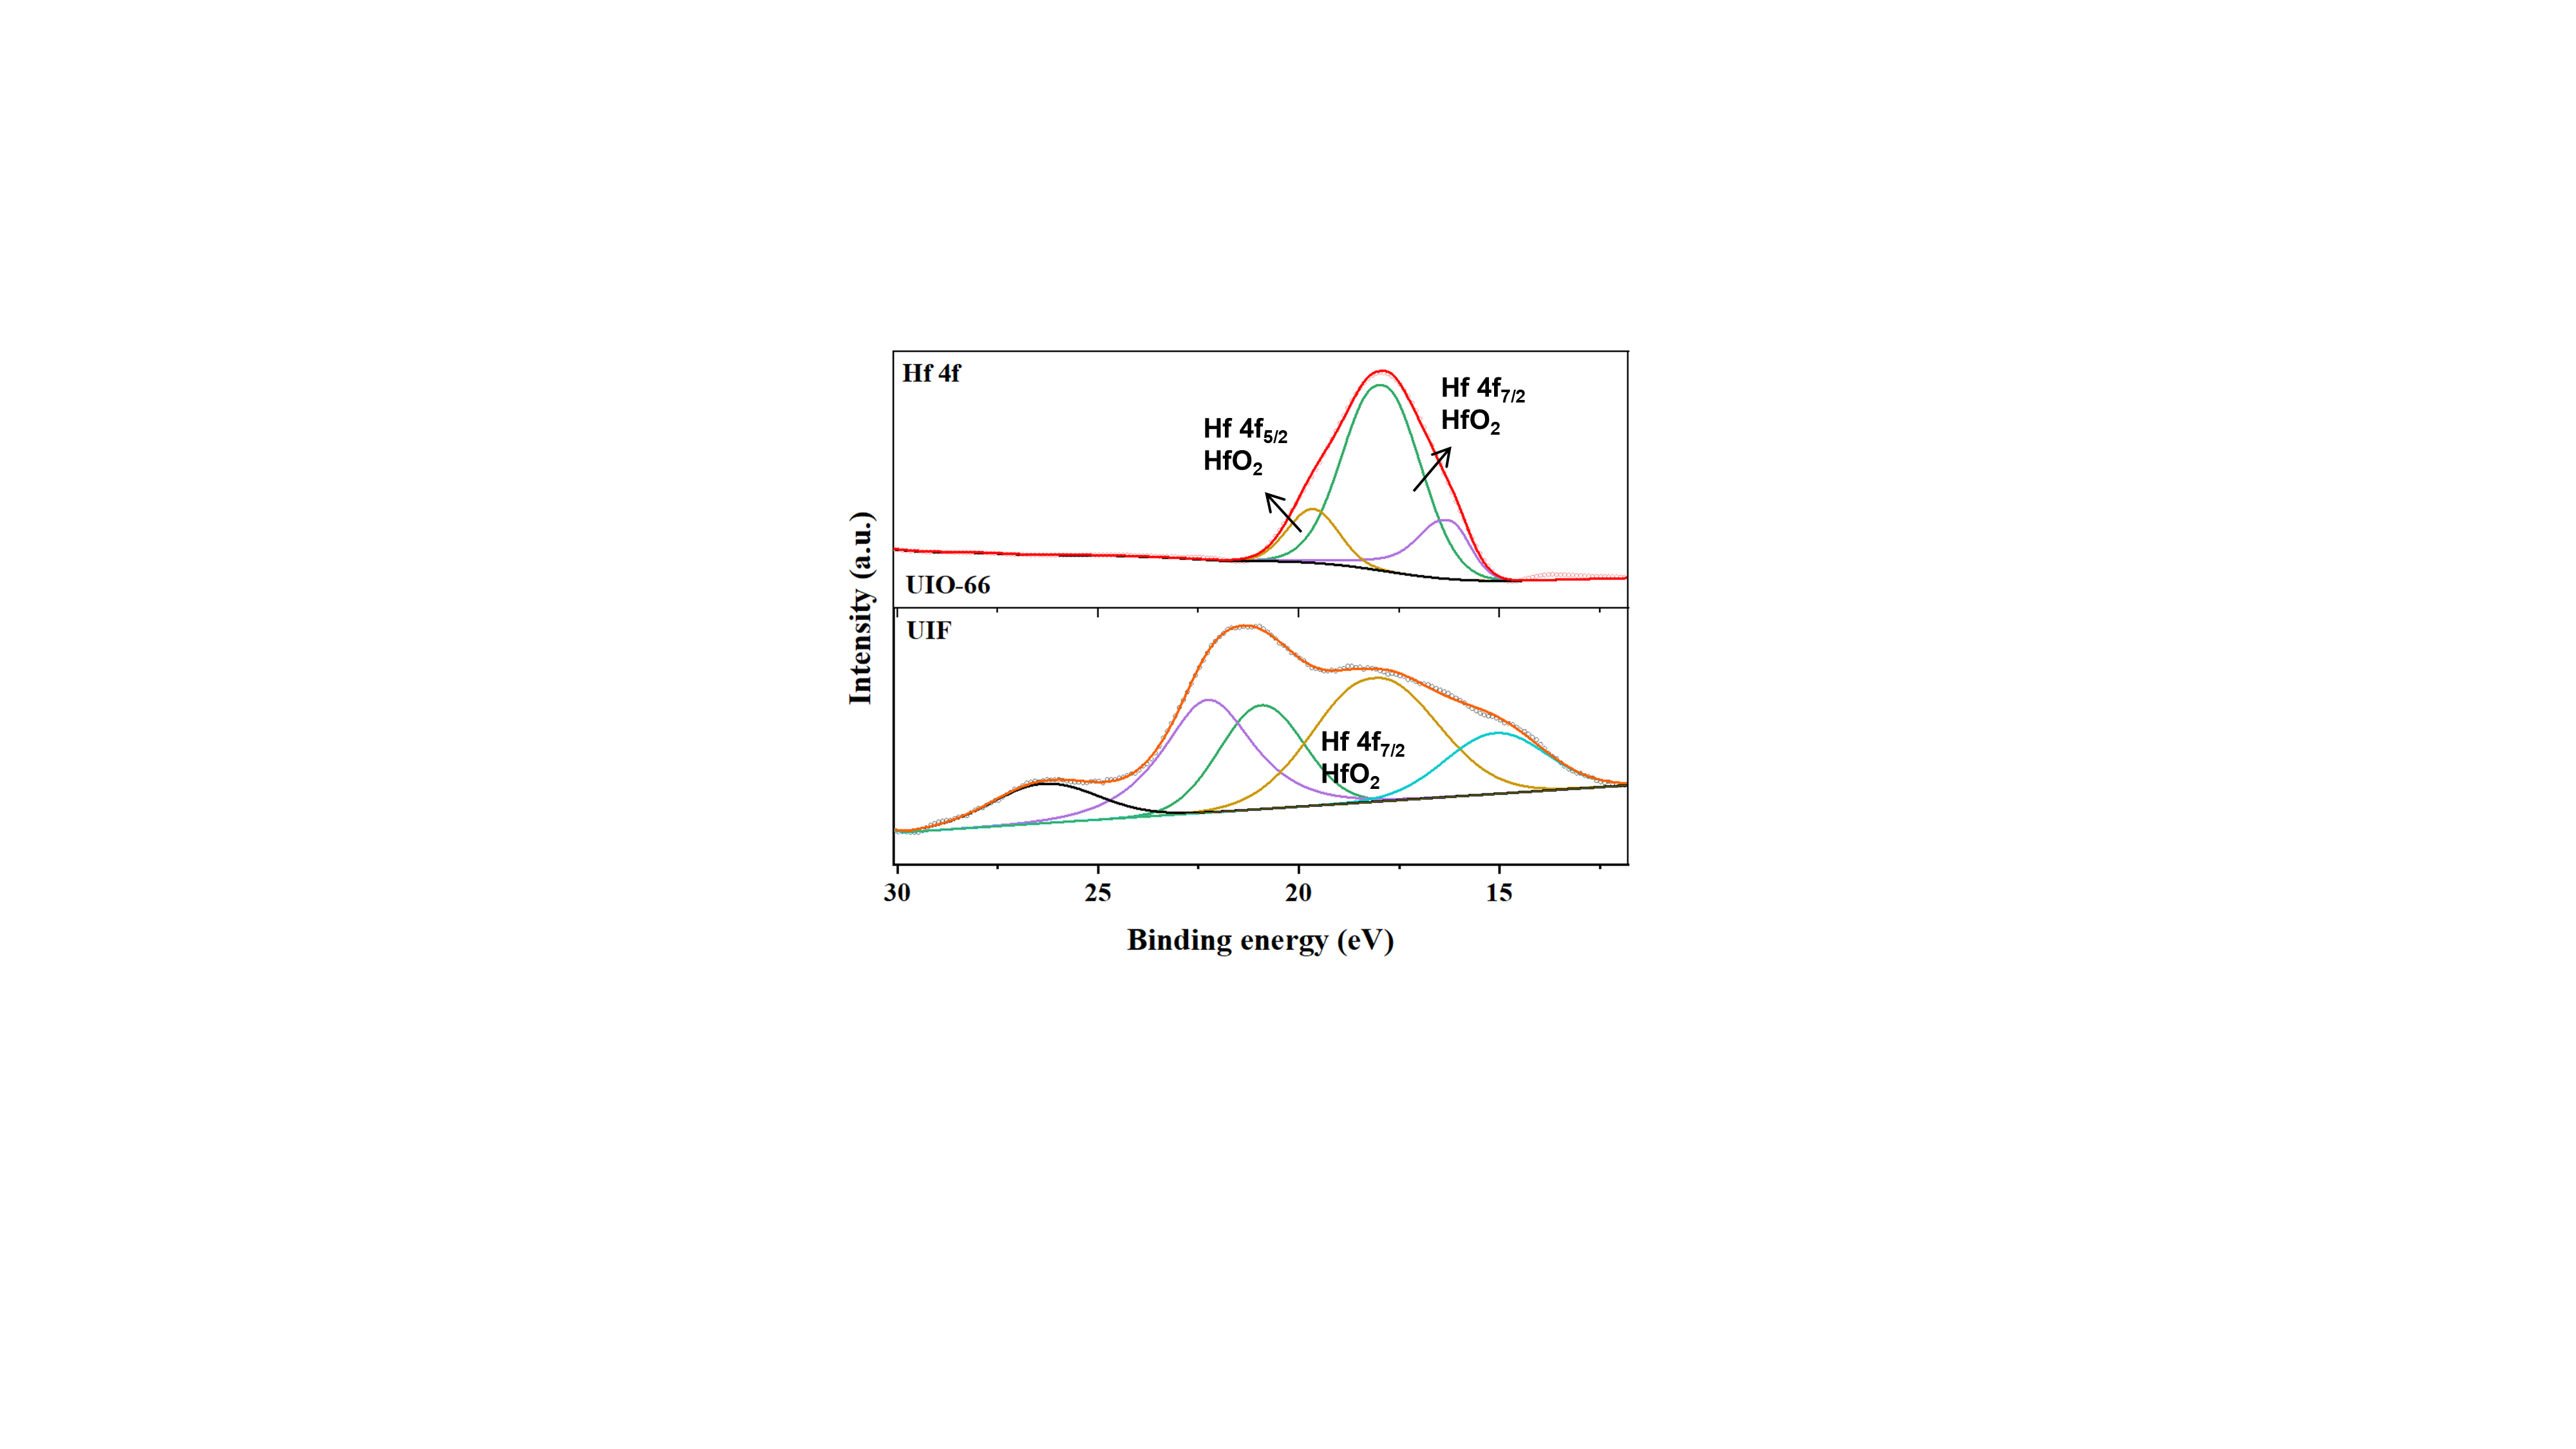


Figure S2. Comparison of XPS spectra of Hf elements in UIO-66 and UIF materials.


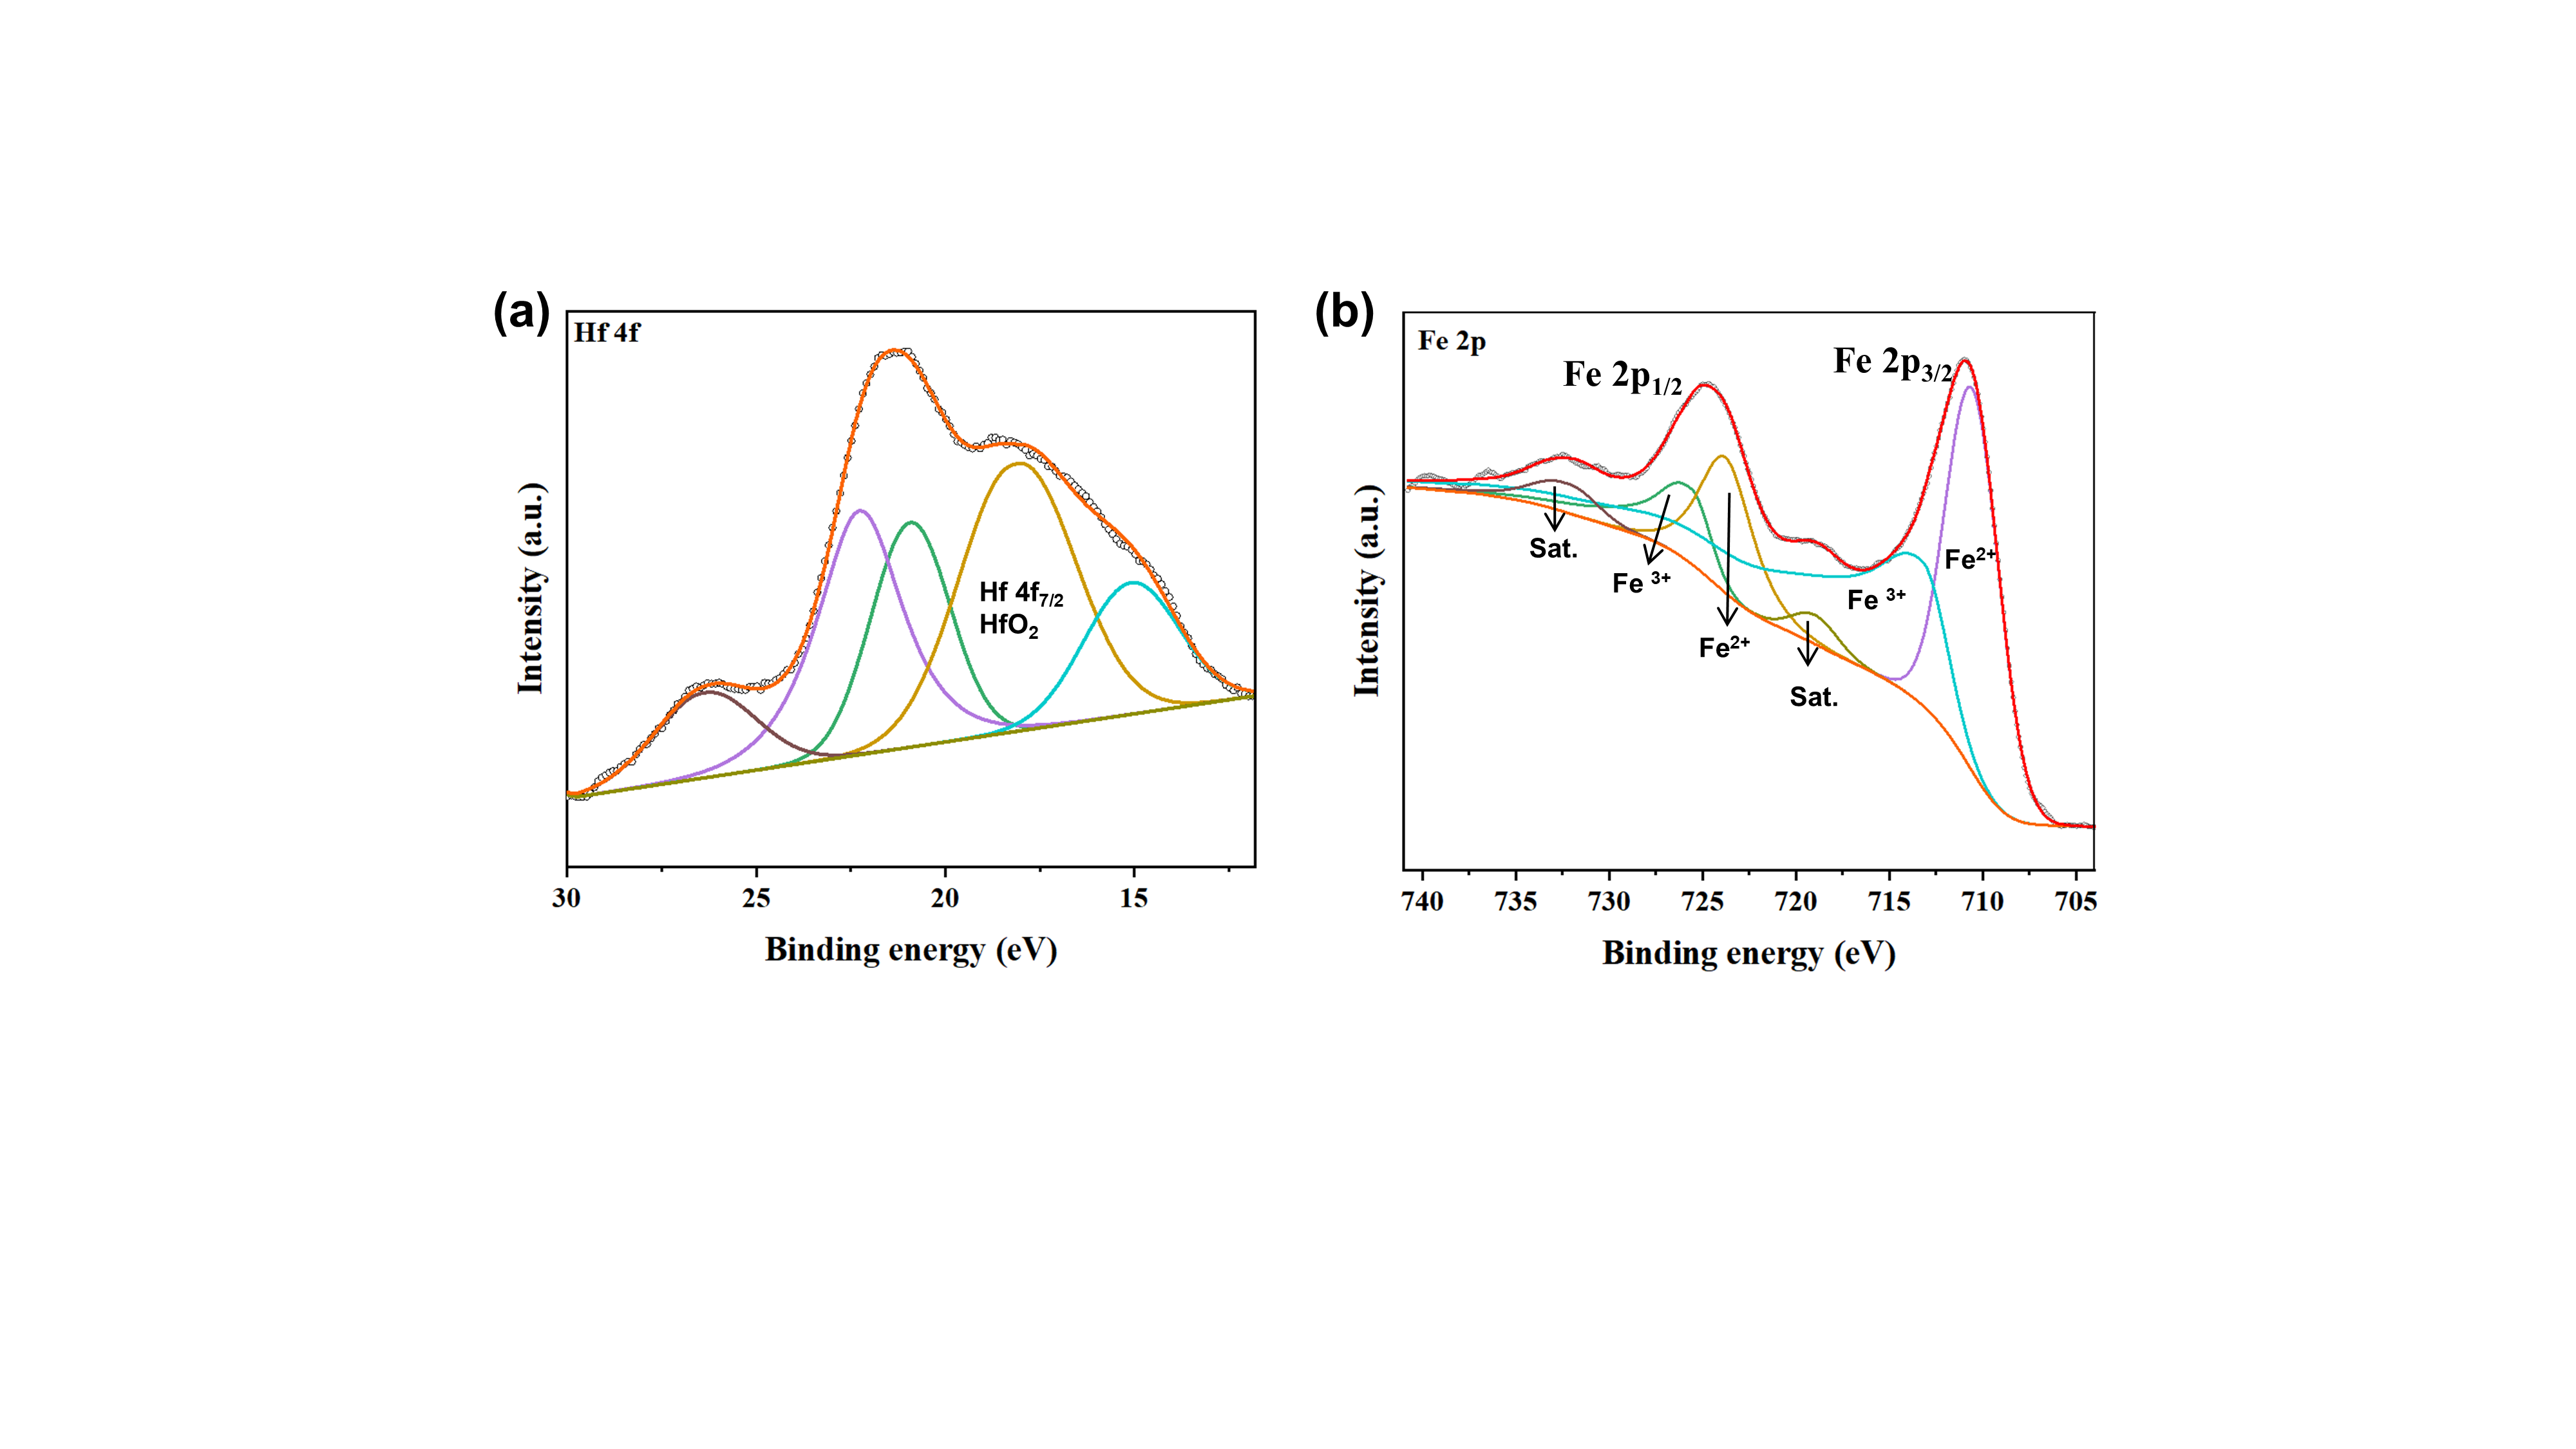


Figure S3. The XPS spectrum of Hf, and Fe of the UIF materials.


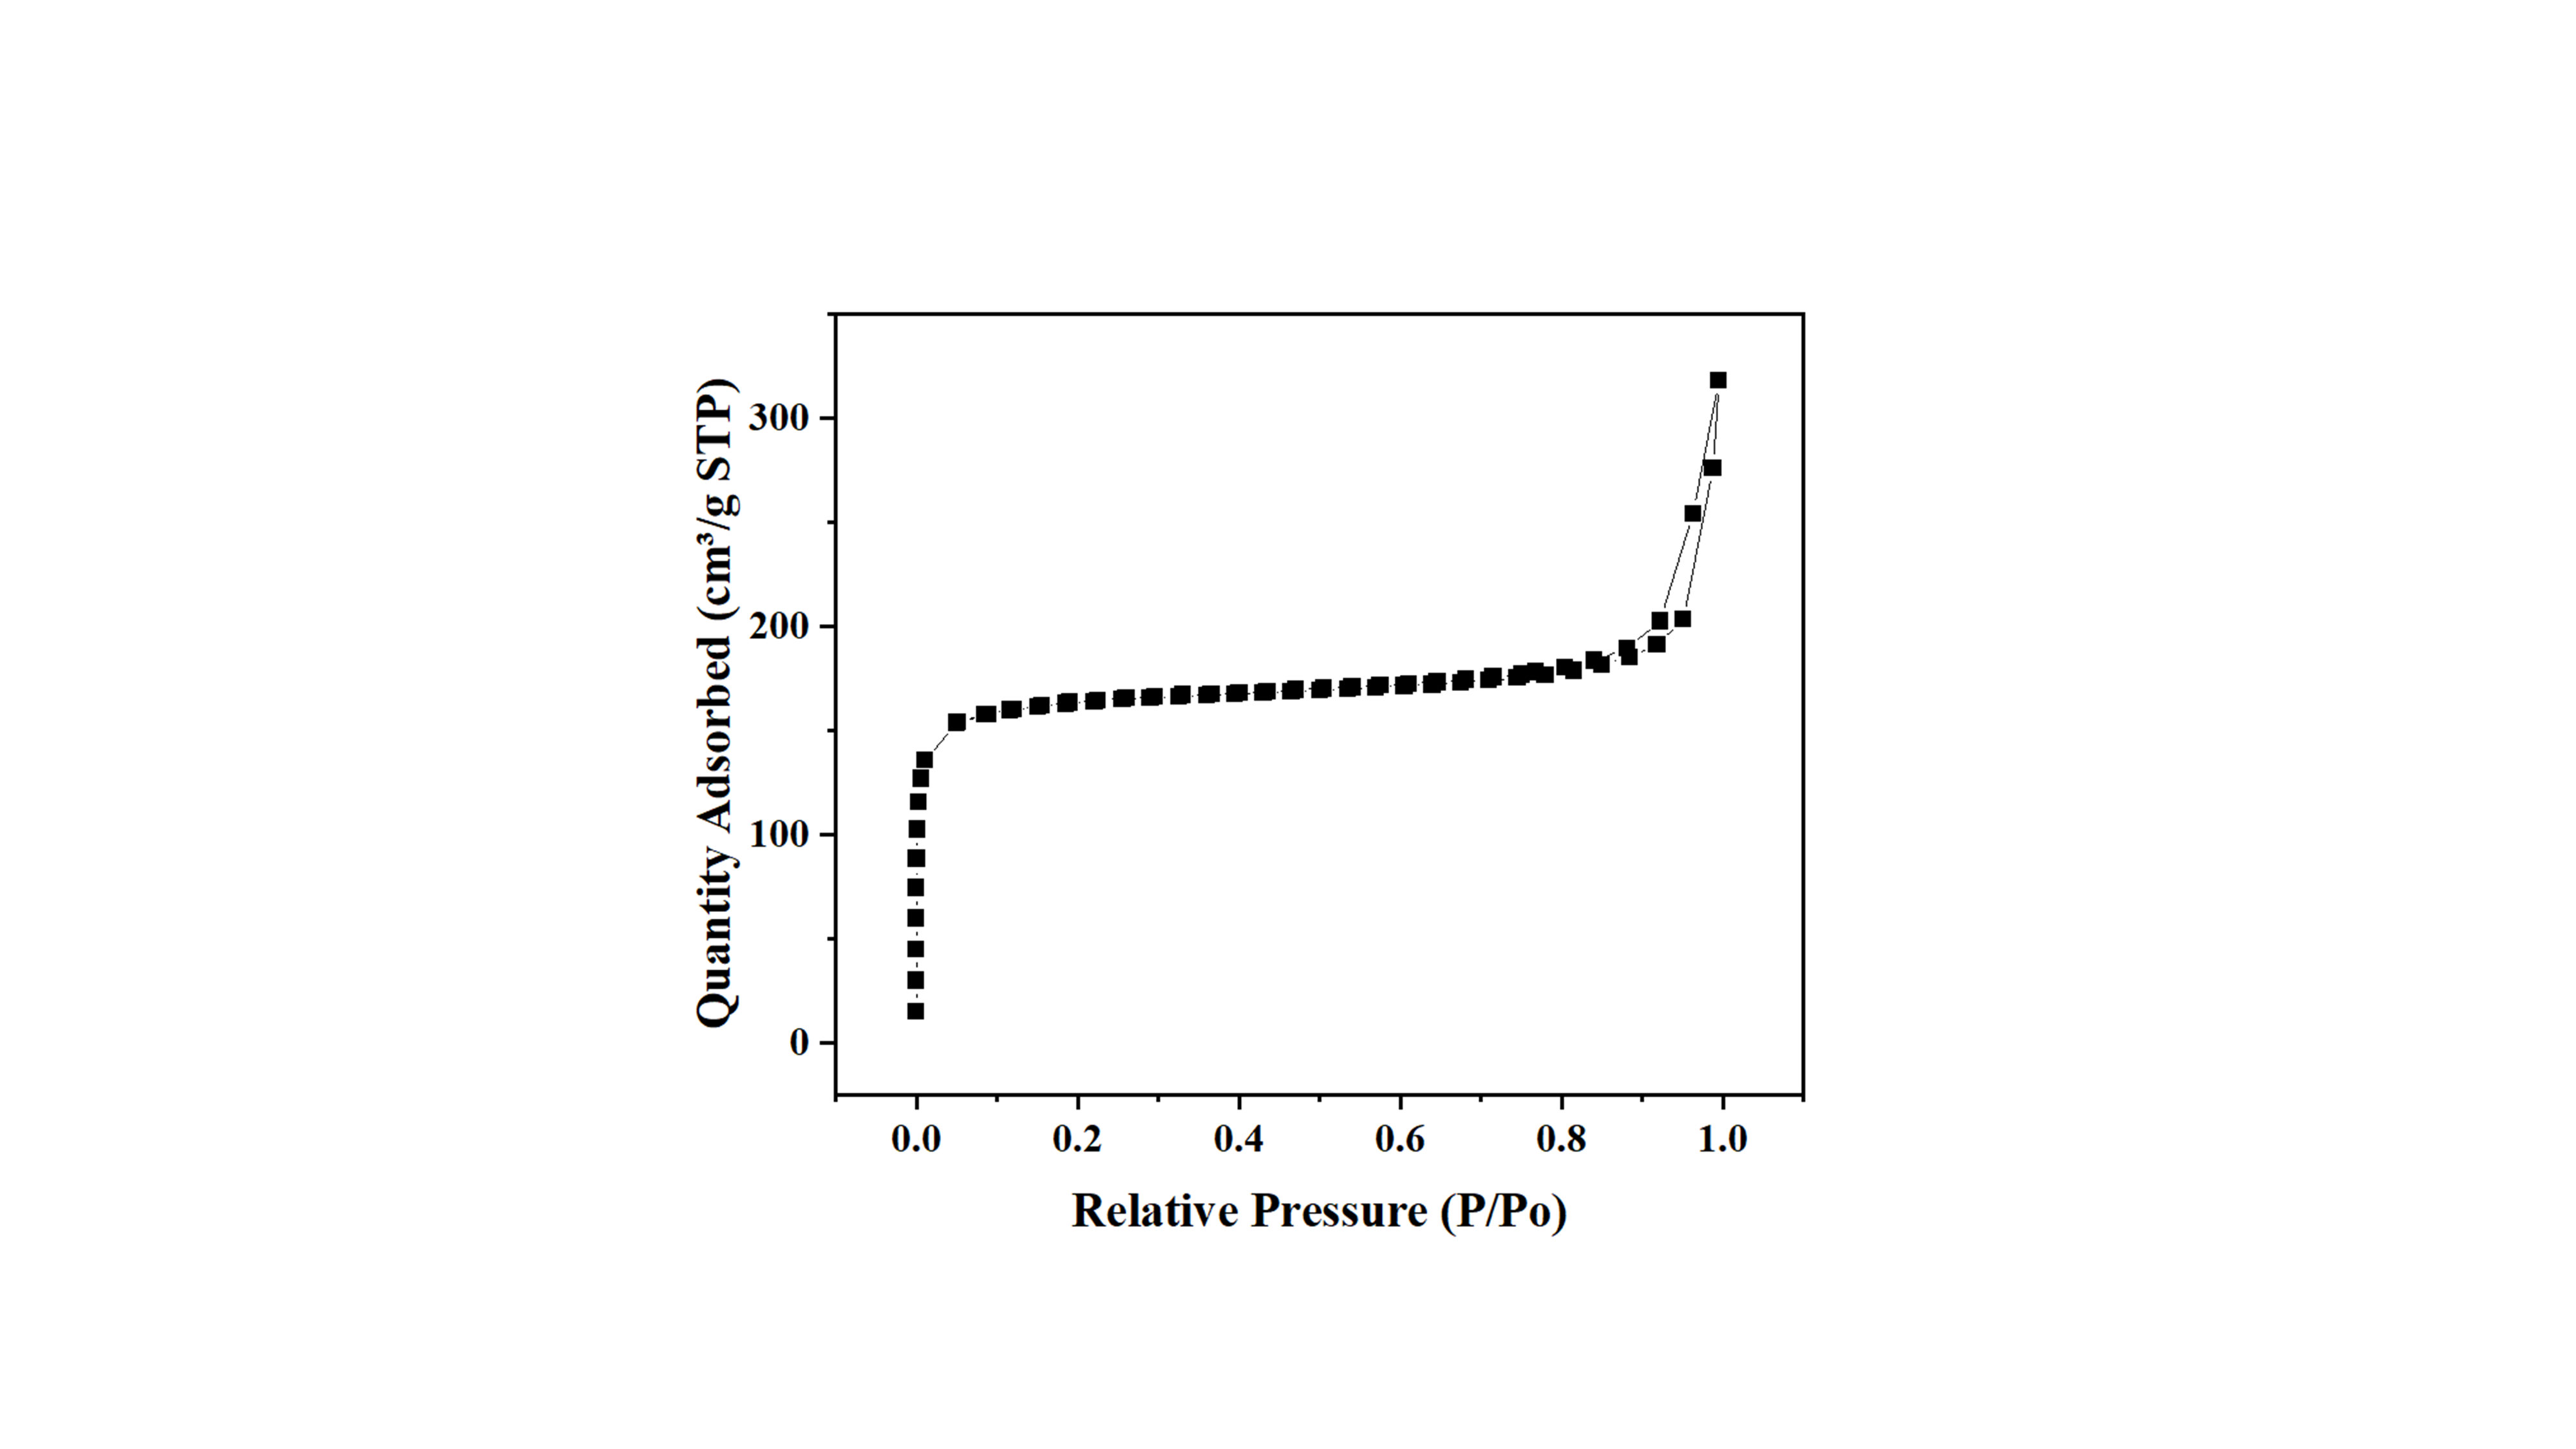


Figure S4. The N2 adsorption and desorption isotherms of the UIF.


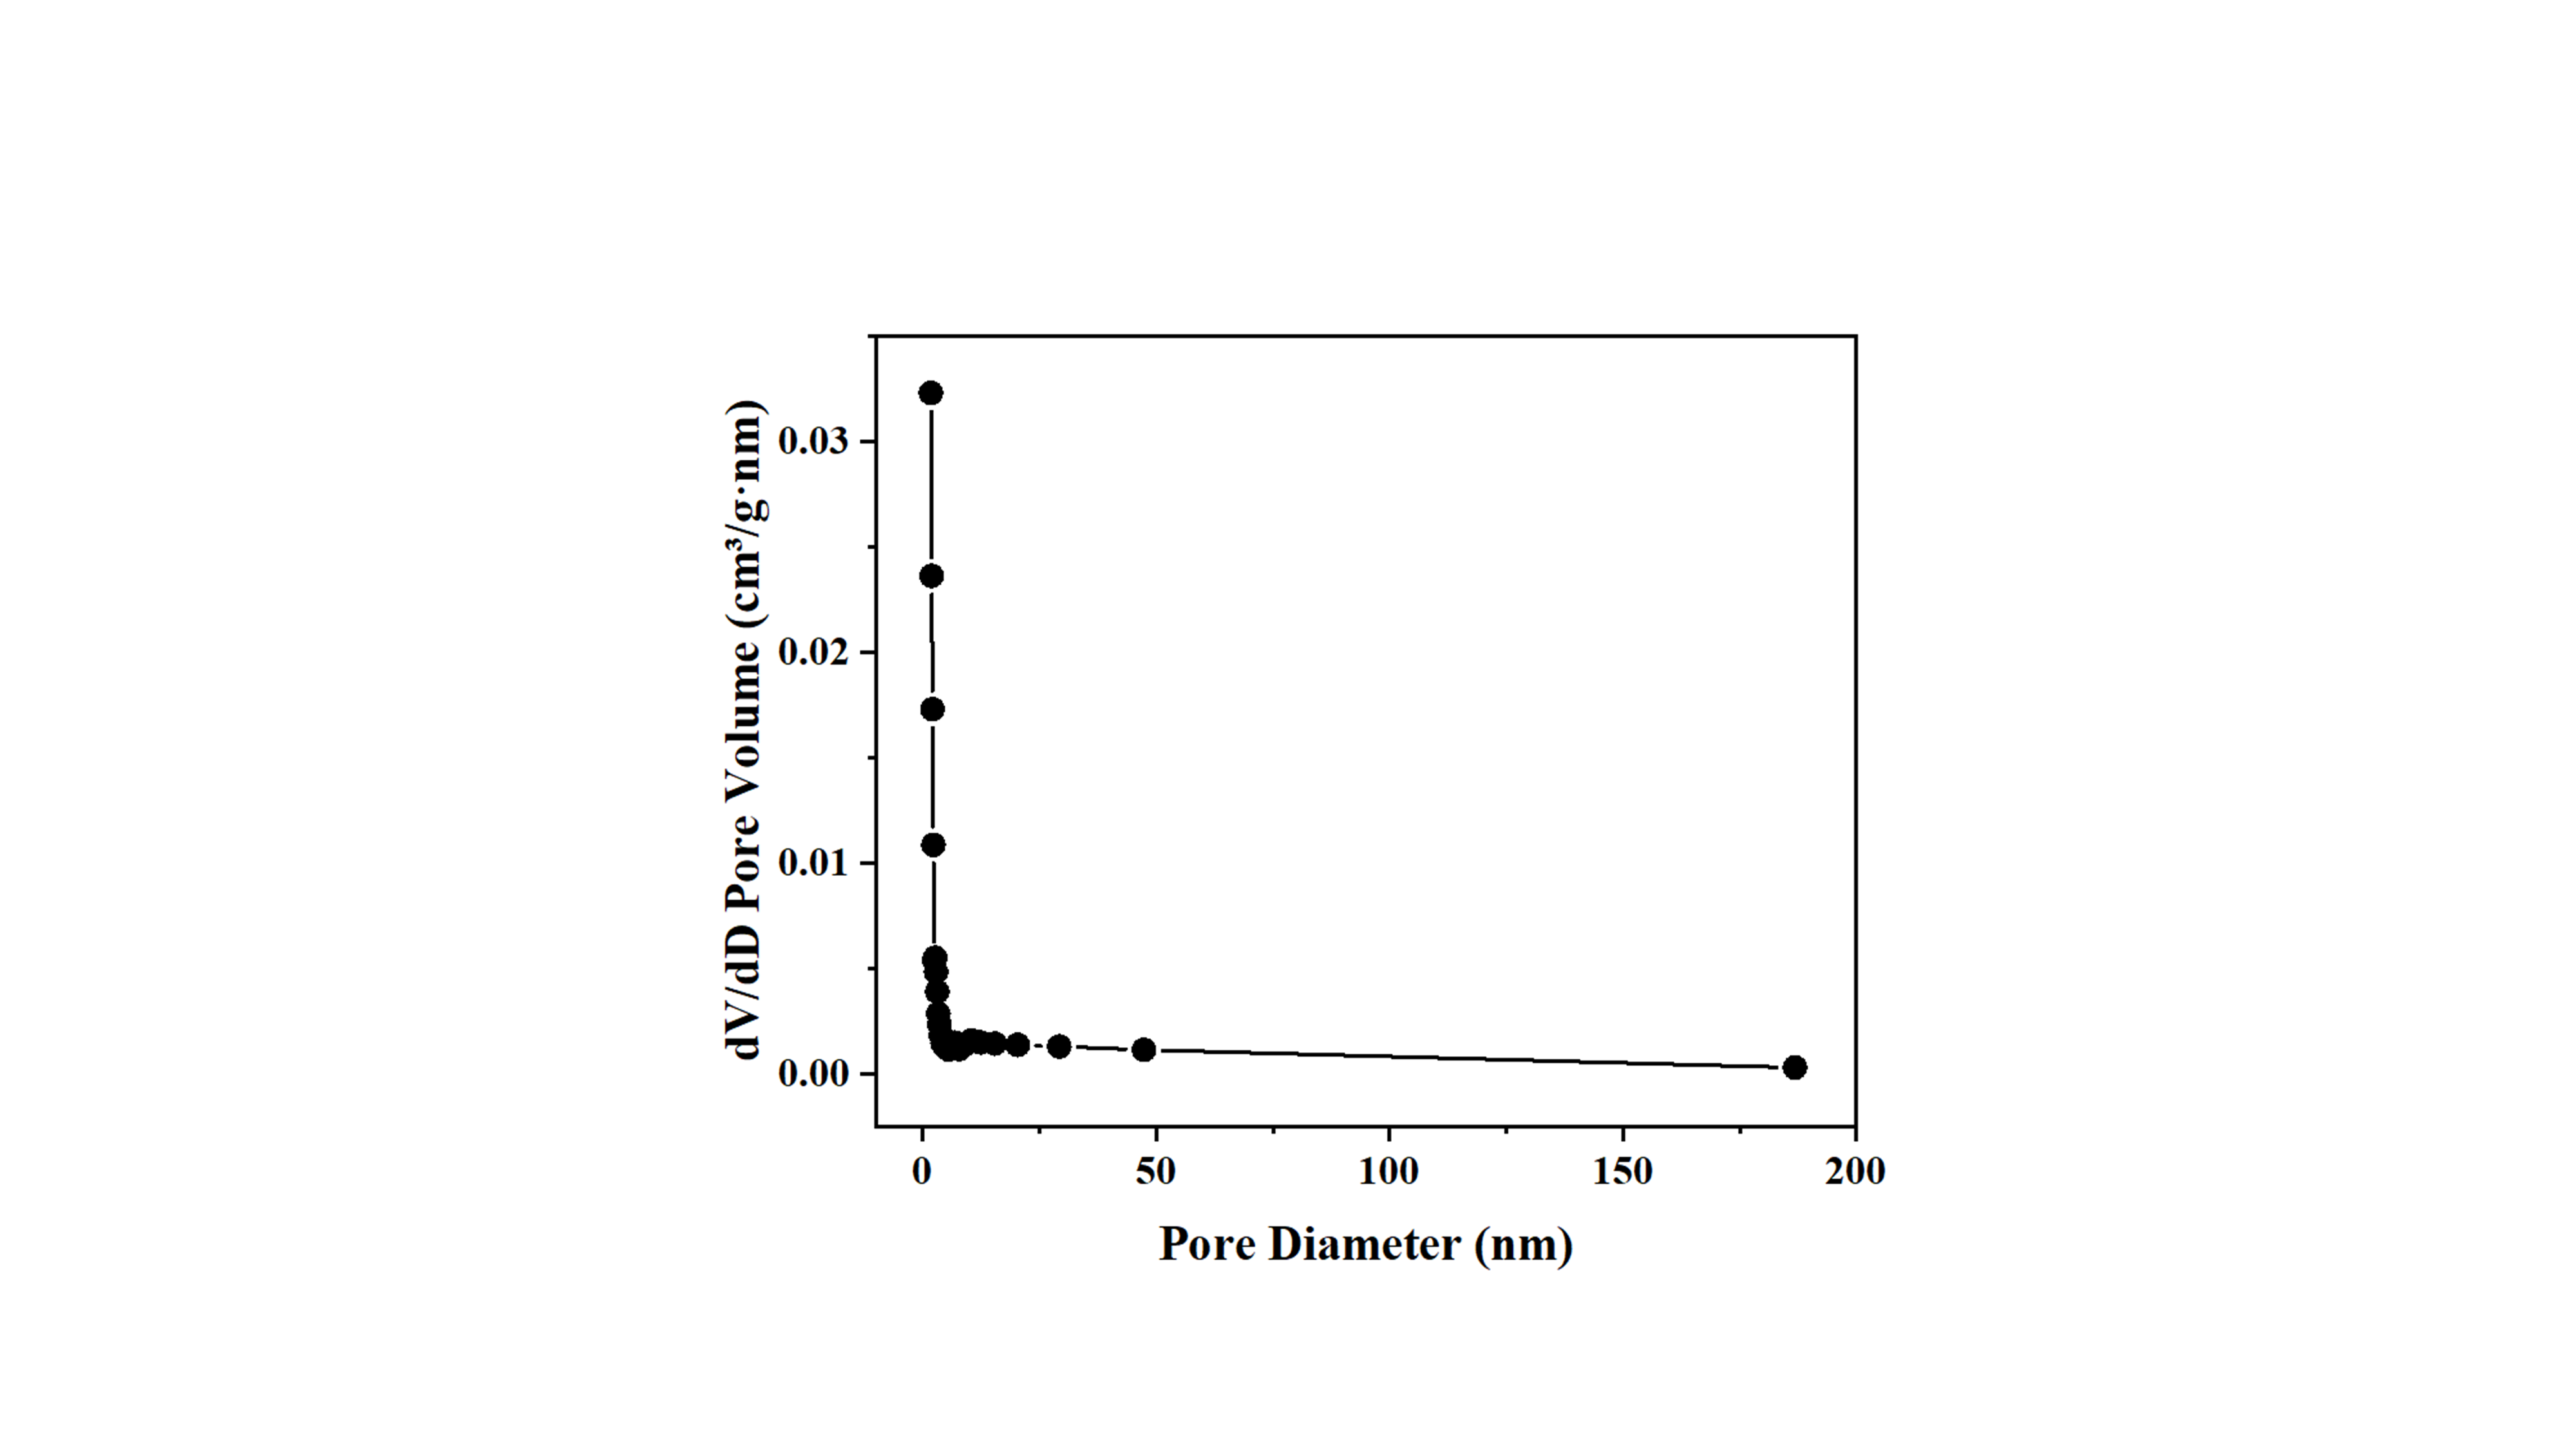


Figure S5. The Barret-Joyner-Halenda (BJH) pore size distribution graph of the UIF.


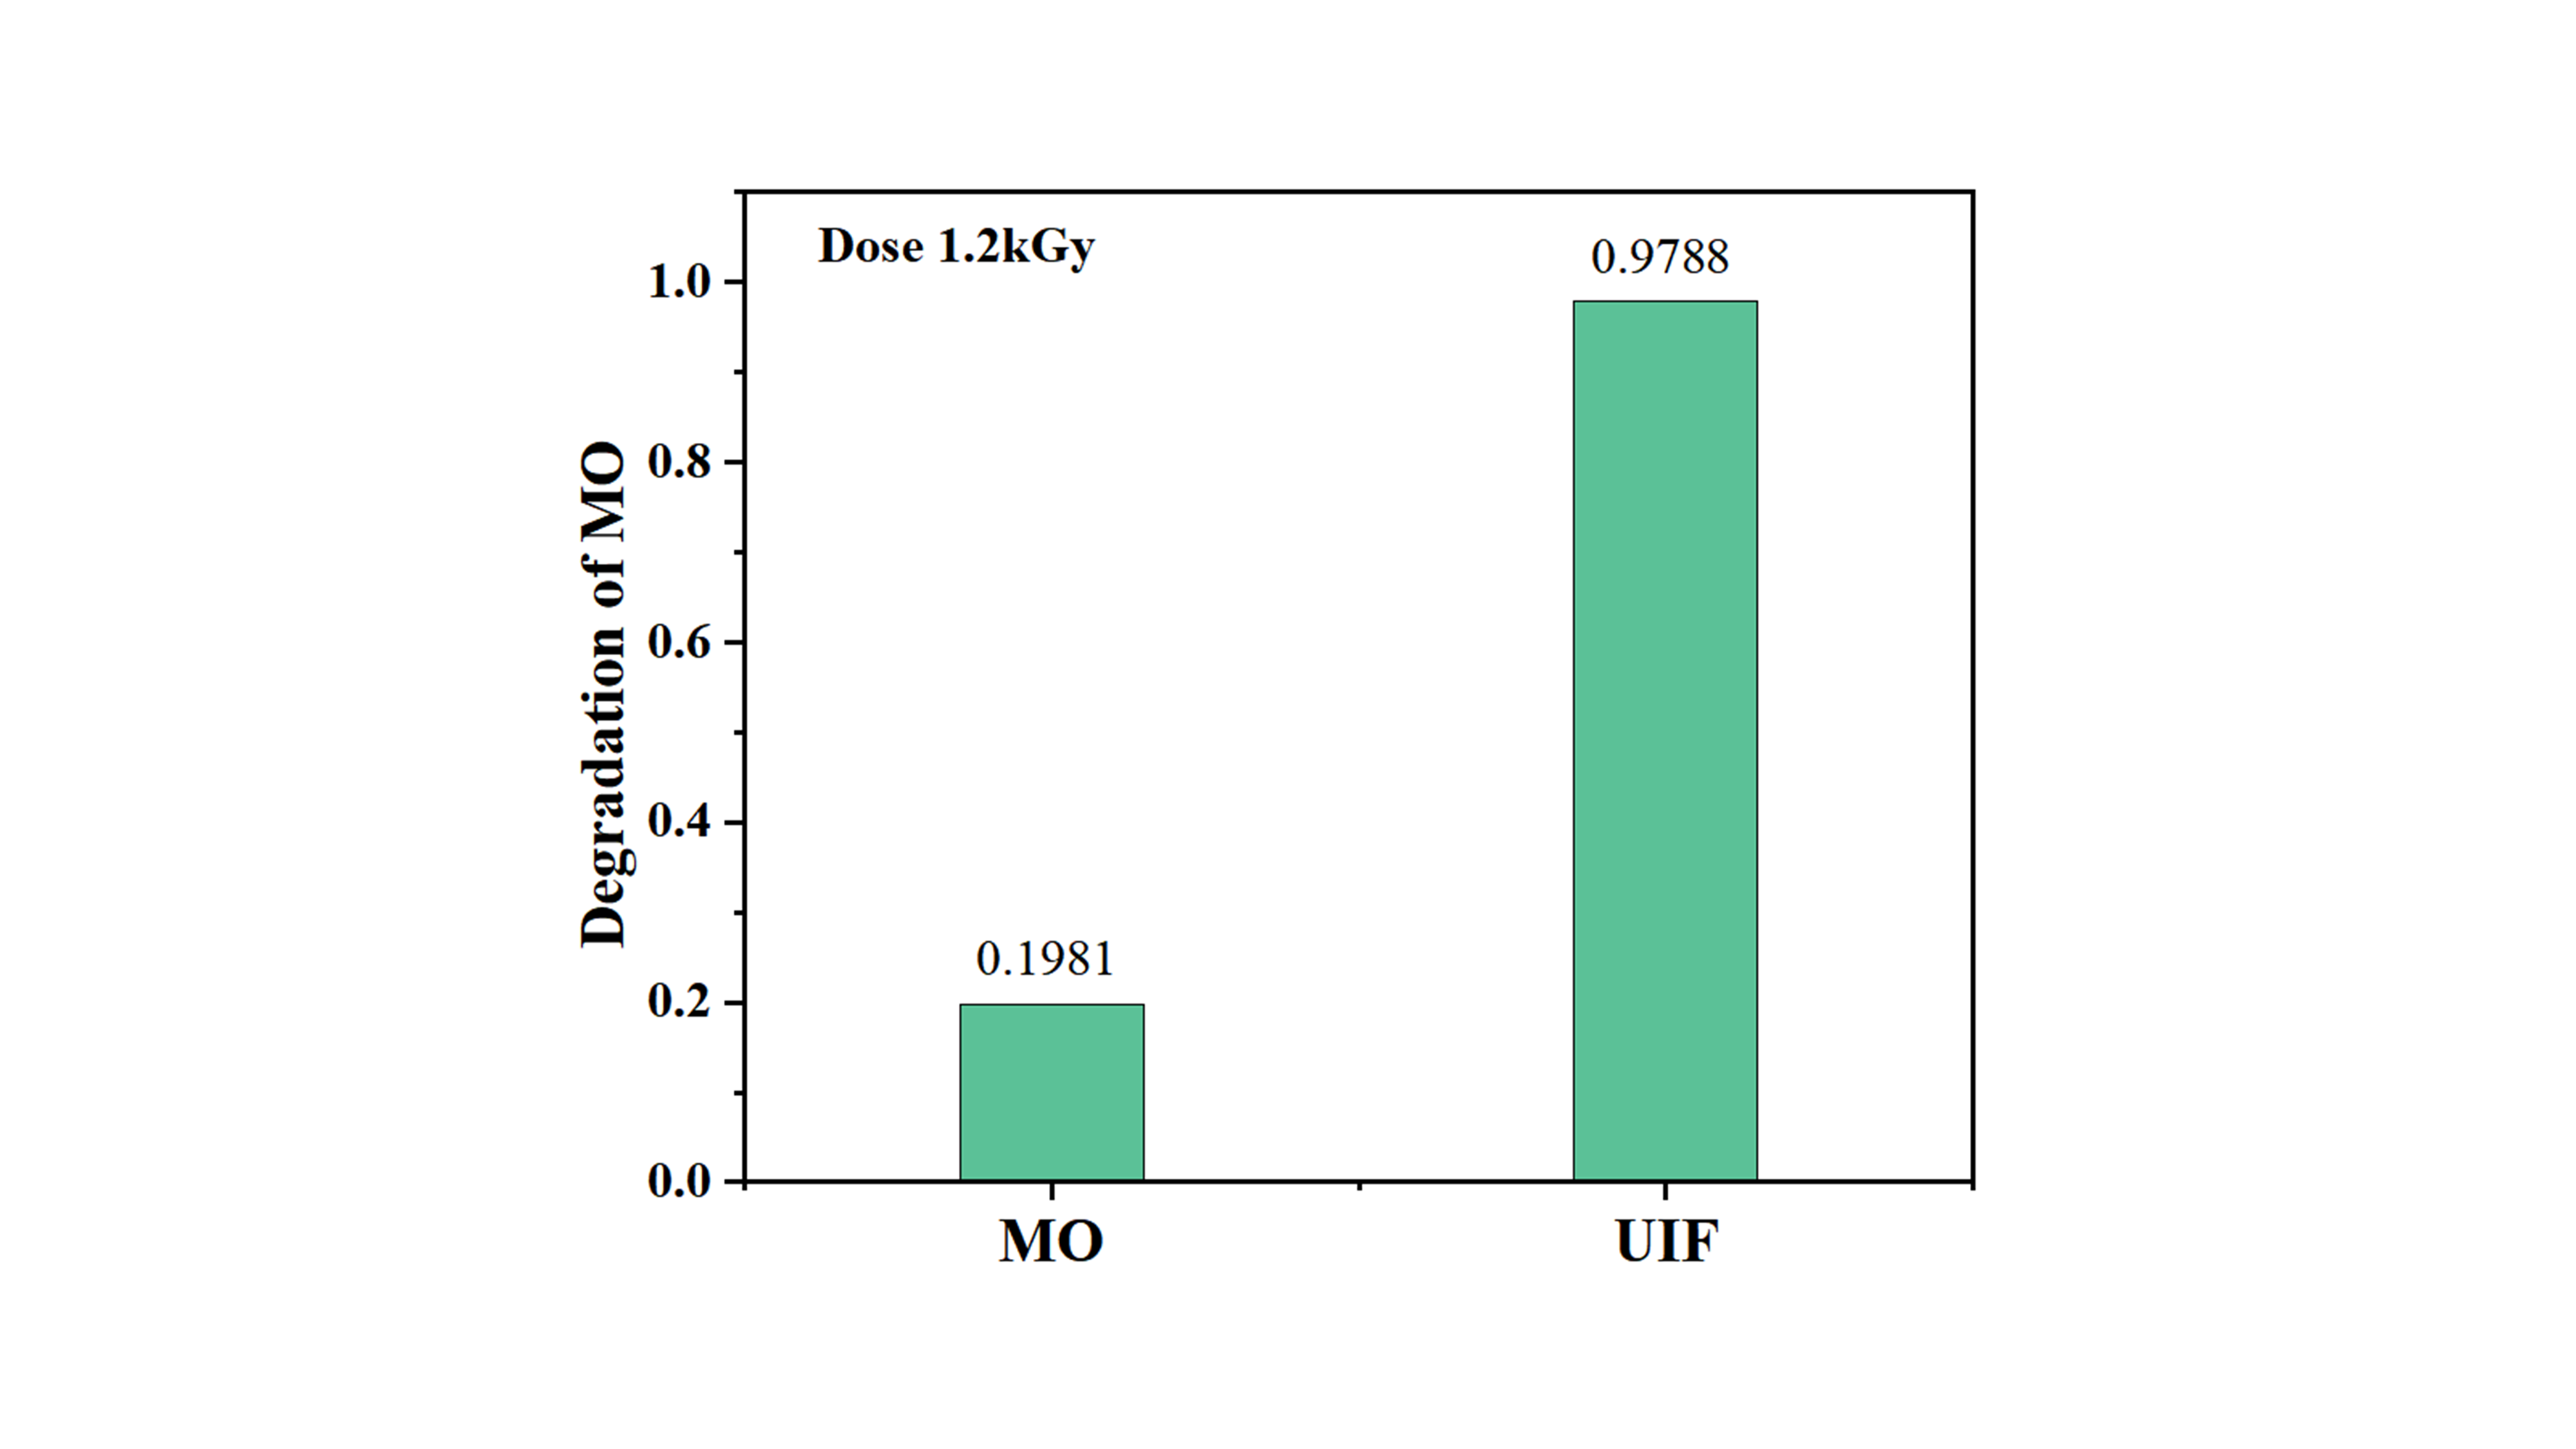


Figure S6. Methyl orange removal rate of UIF material at 1.2k irradiation dose.


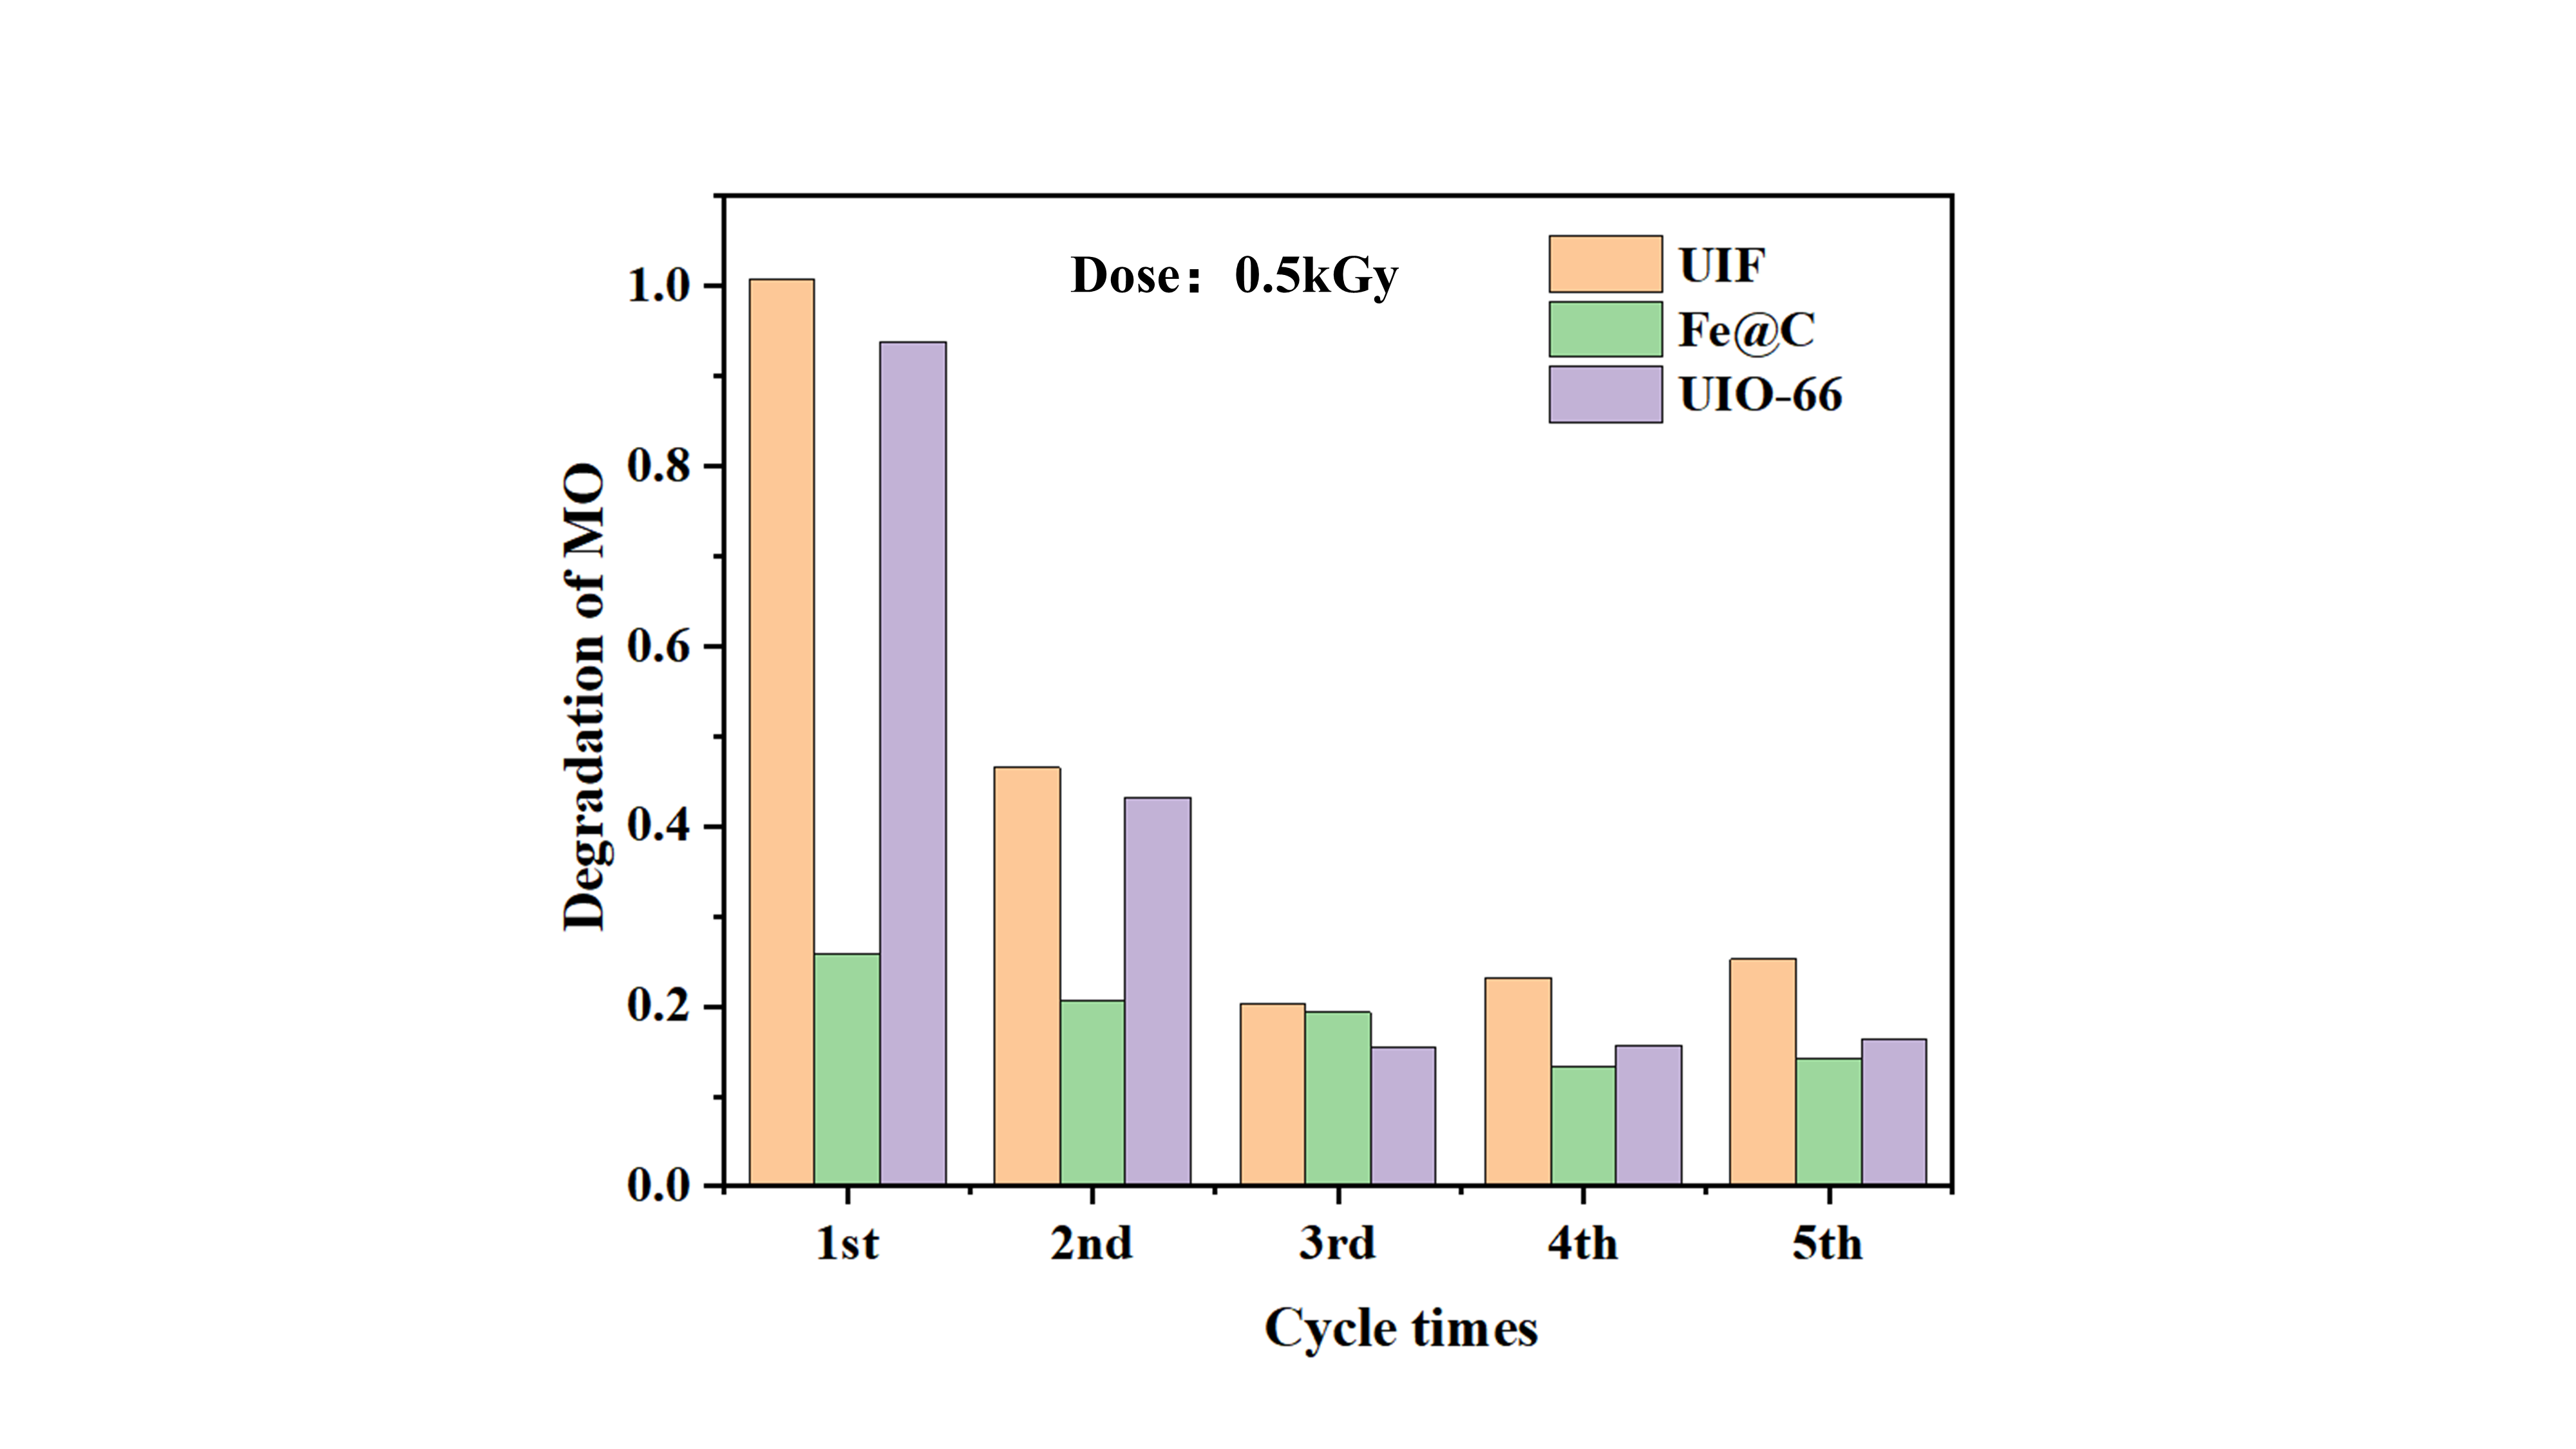


Figure S7. Cycling performance characterization of UIF,UIO-66 and Fe@C.


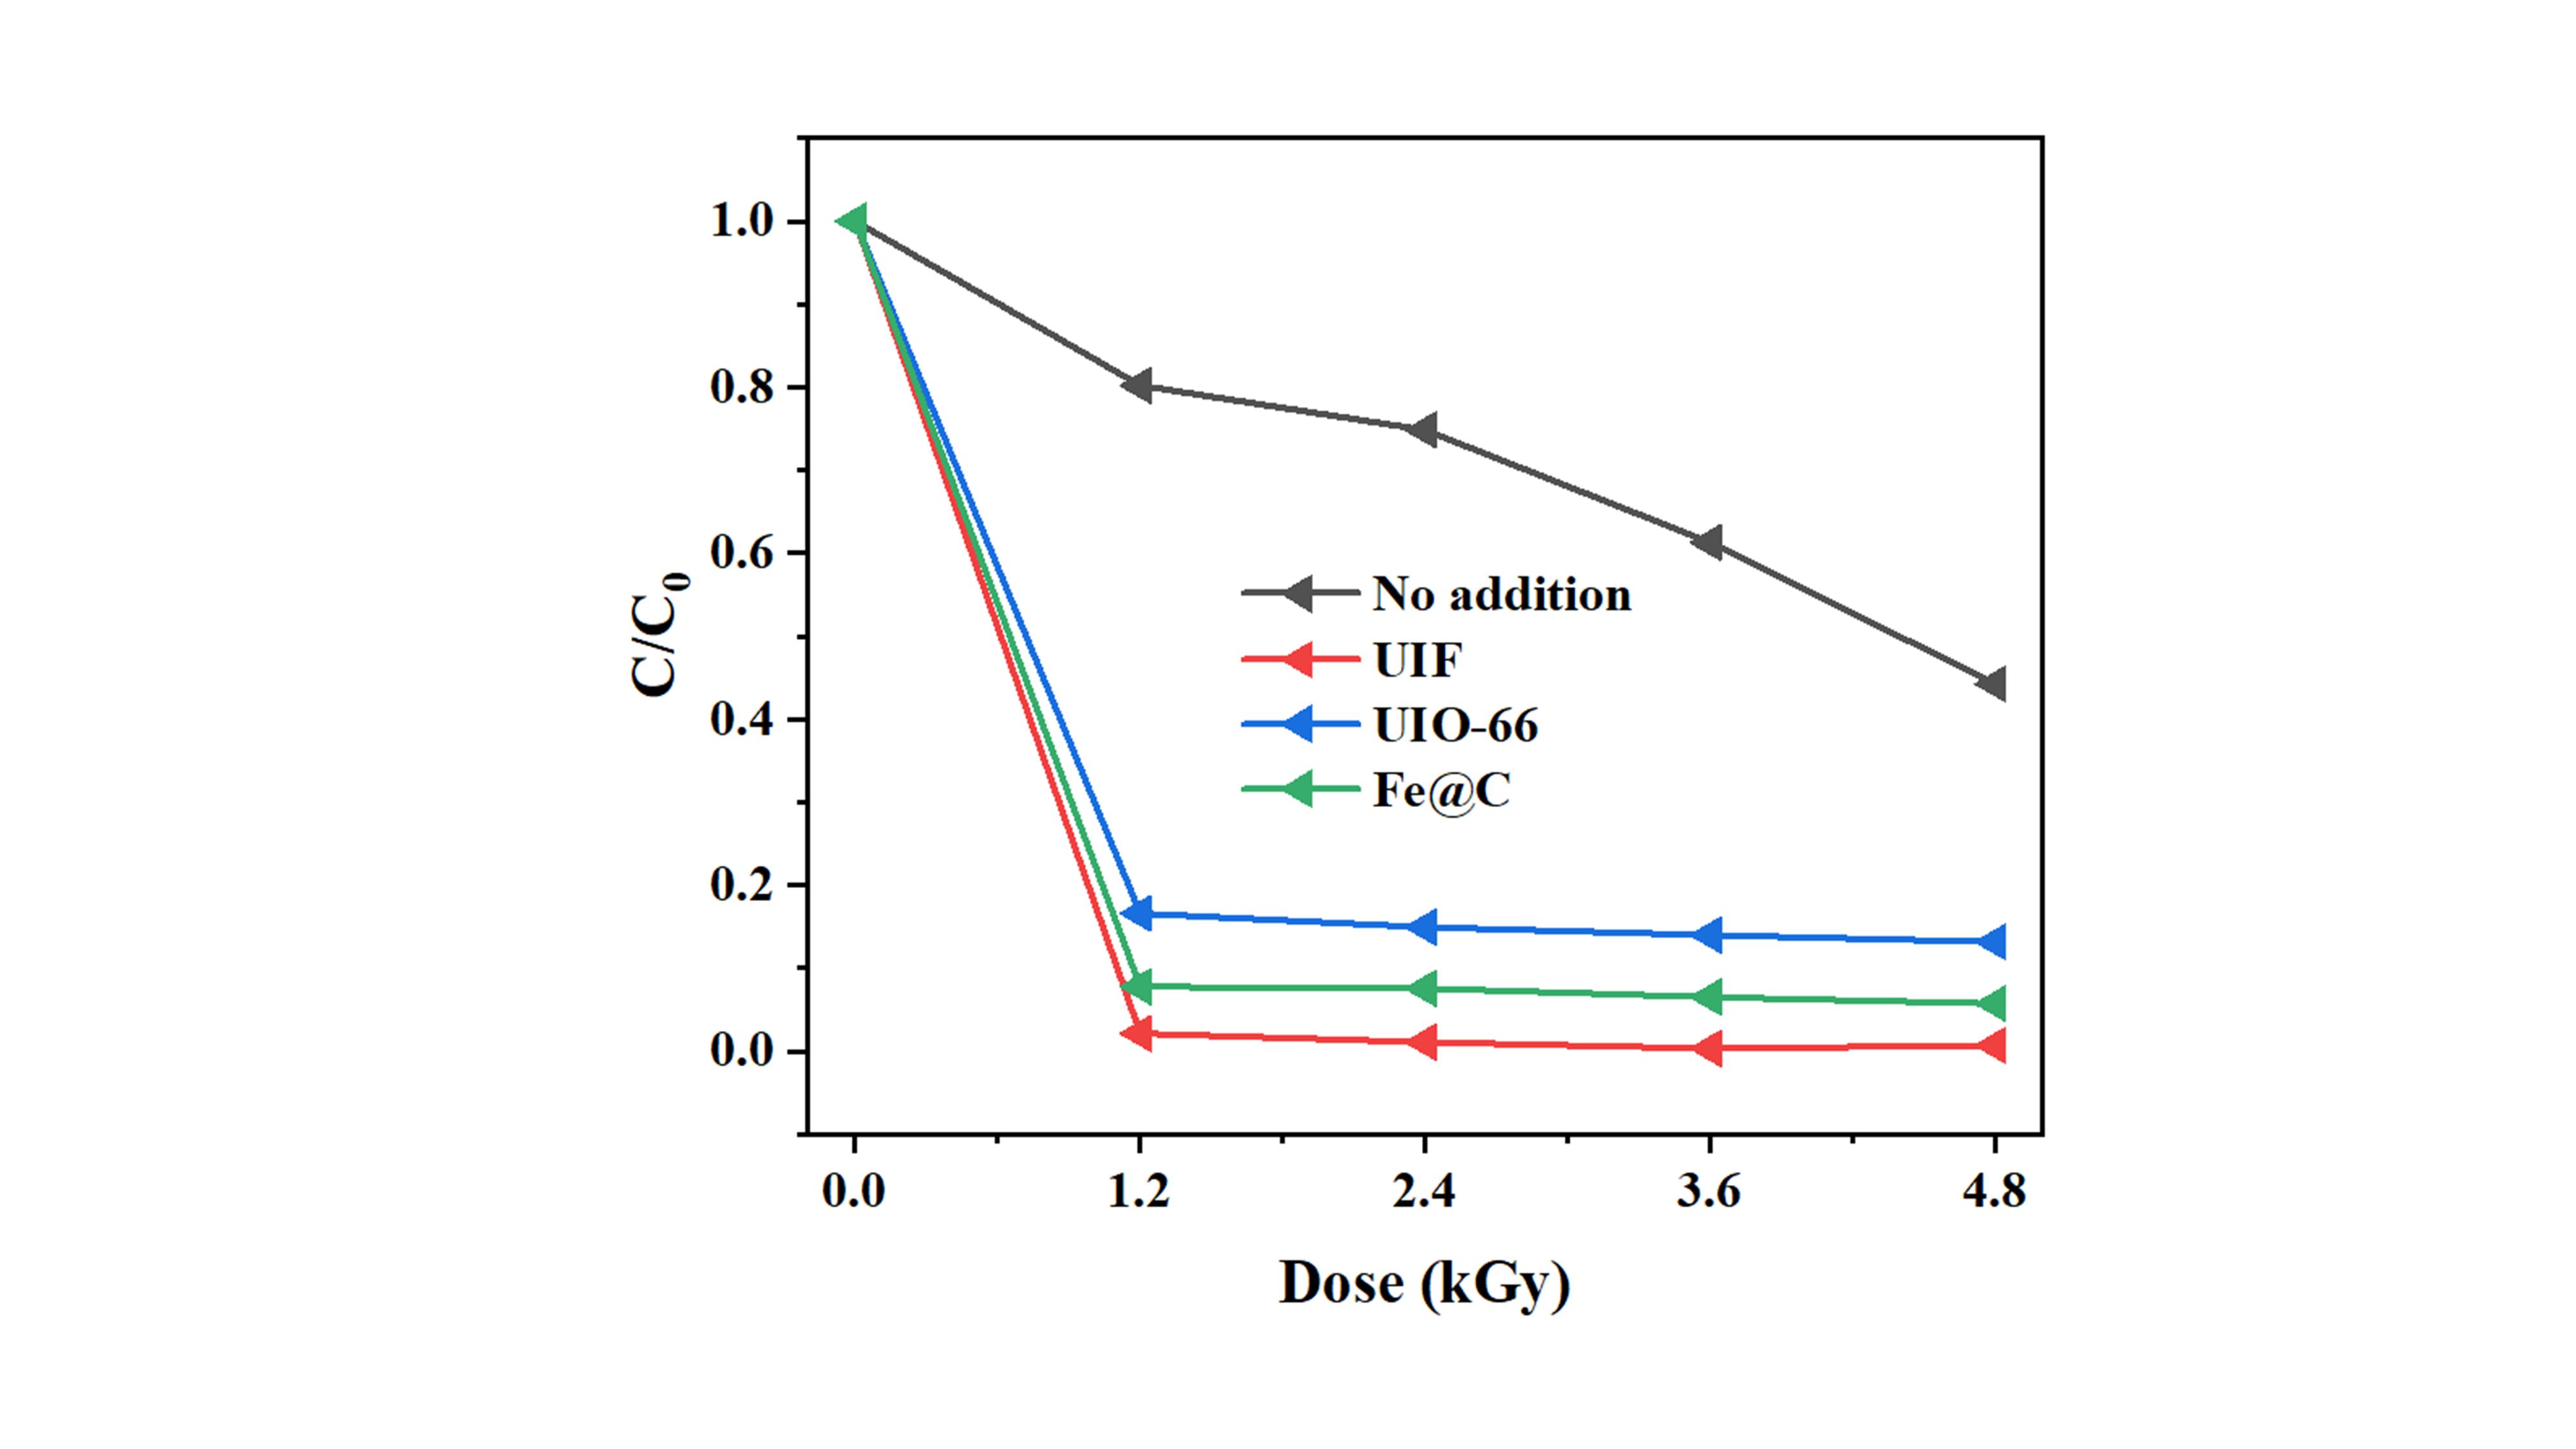


Figure S8. Degradation effect of catalyst under different irradiation doses.


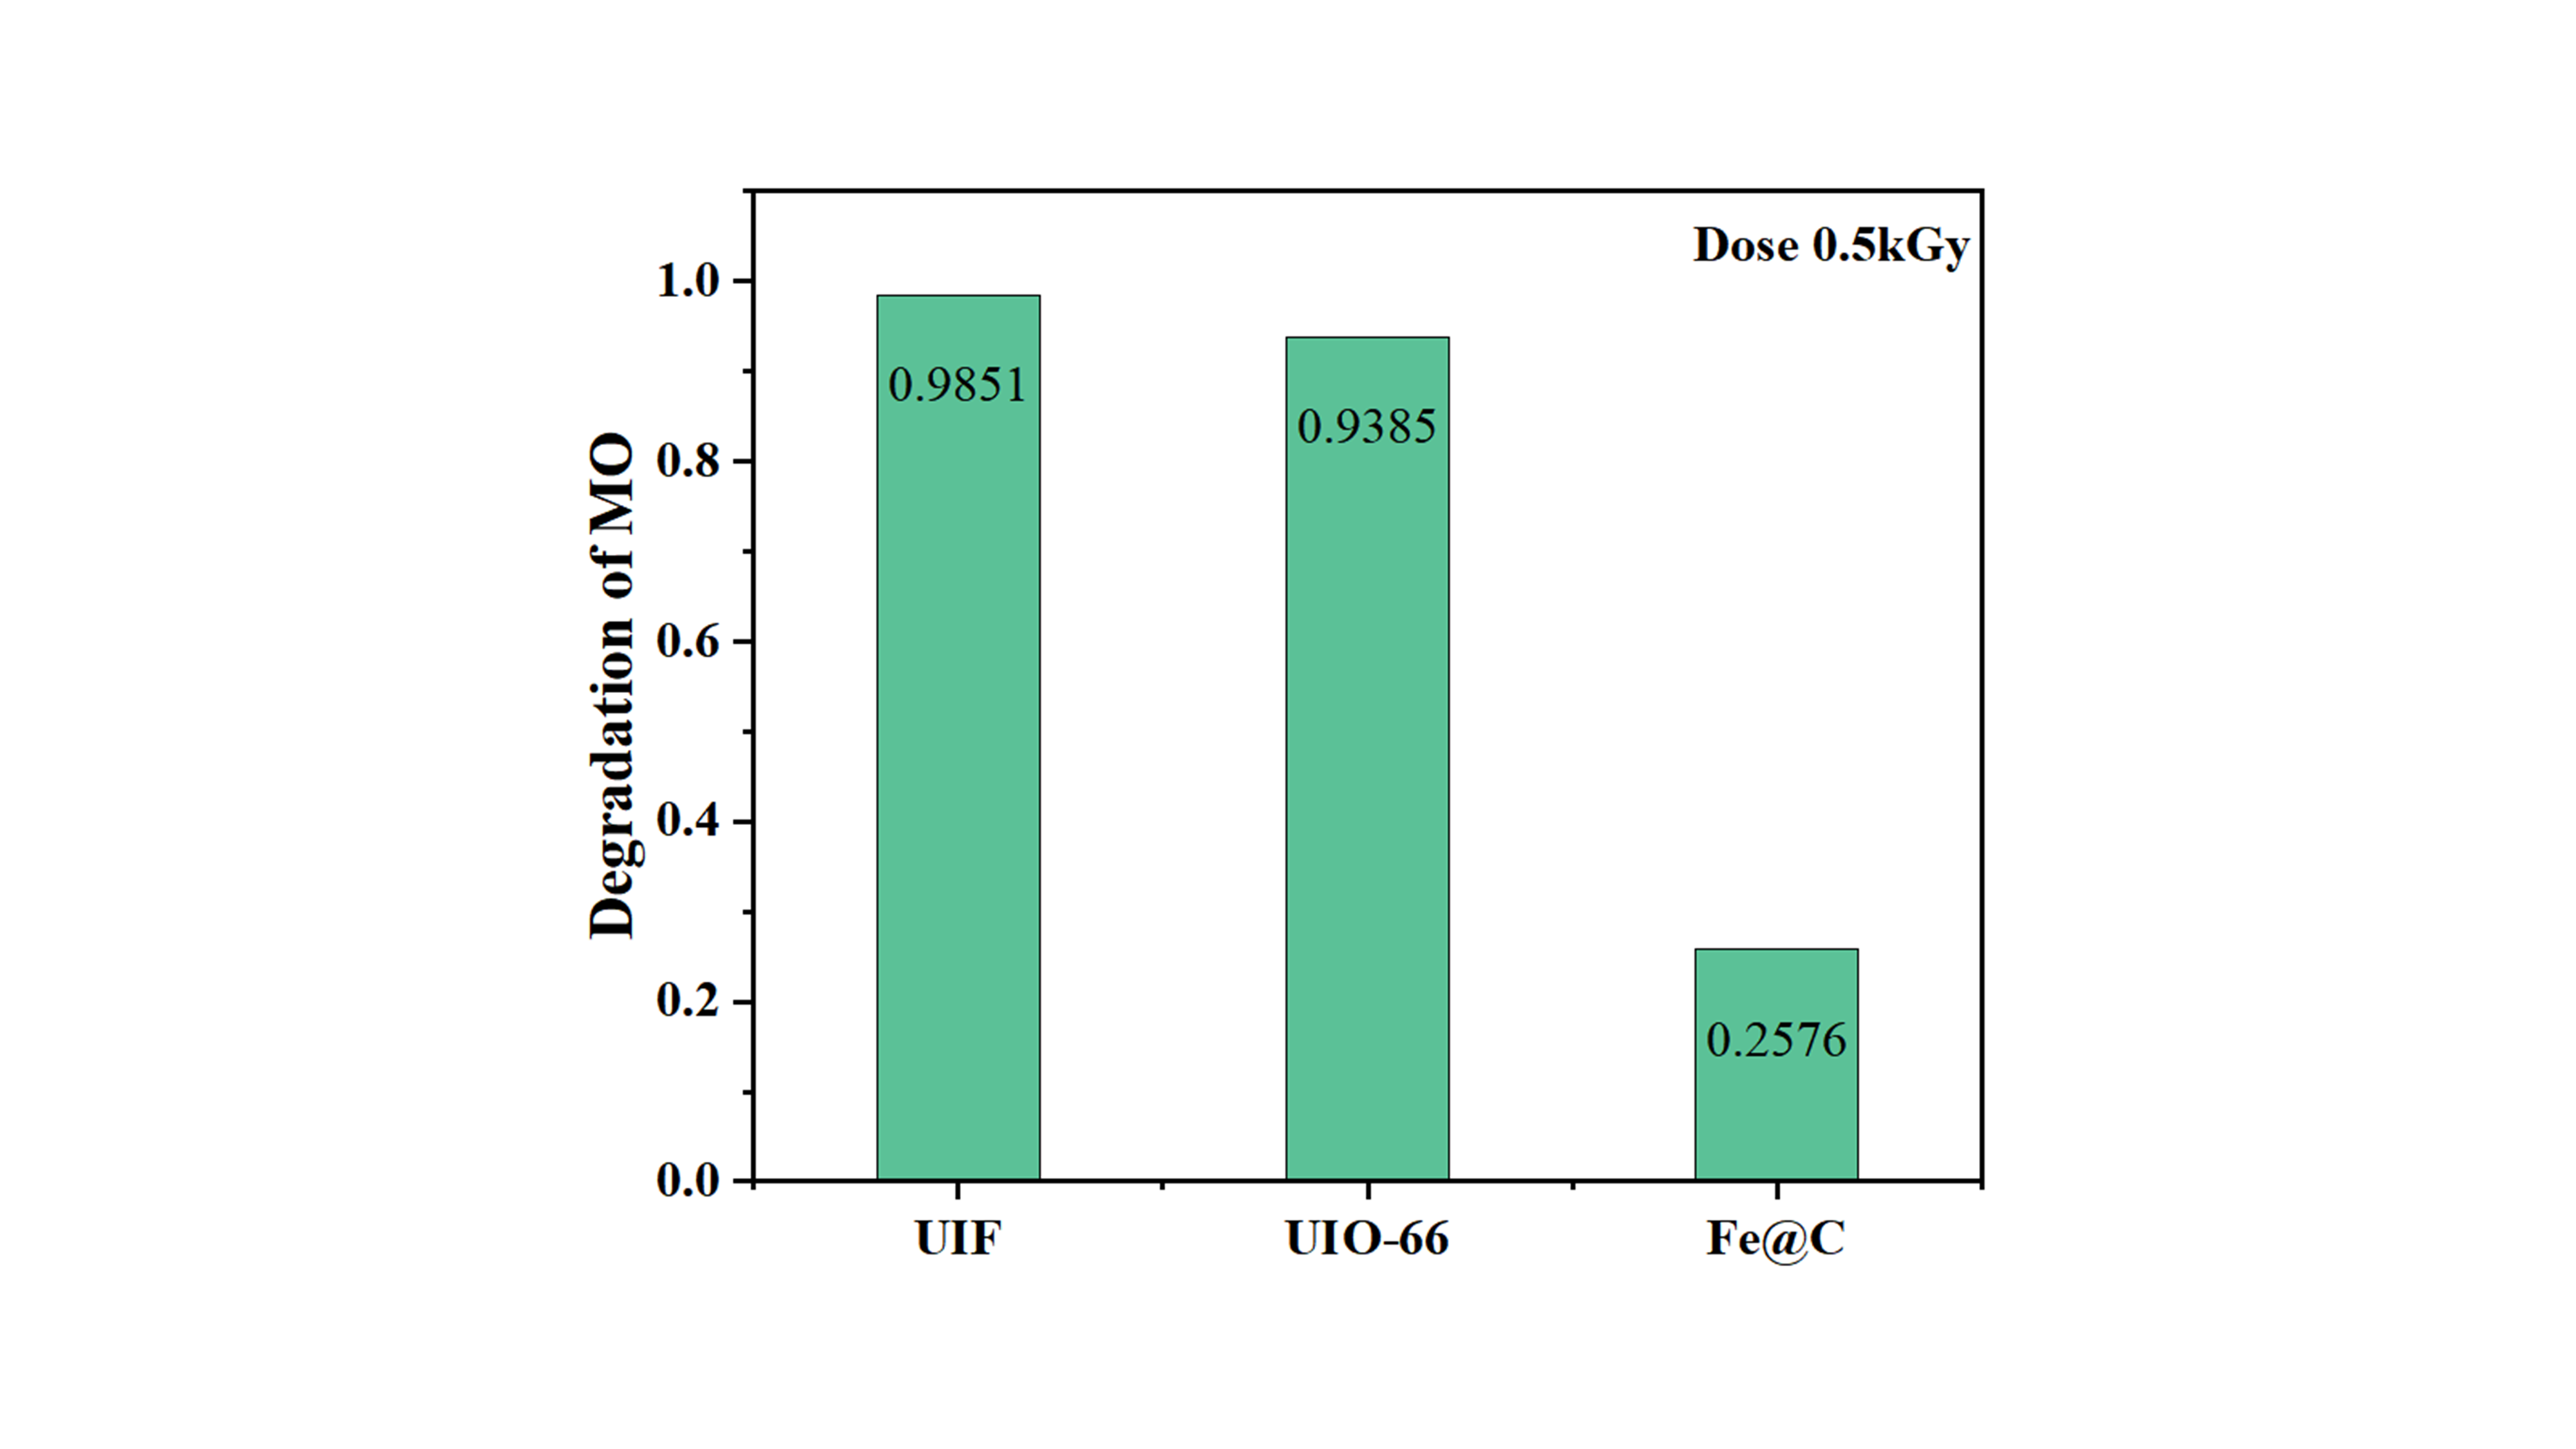


Figure S9. Comparison of removal rates under low dose irradiation of UIF, UIO-66 and Fe@C.


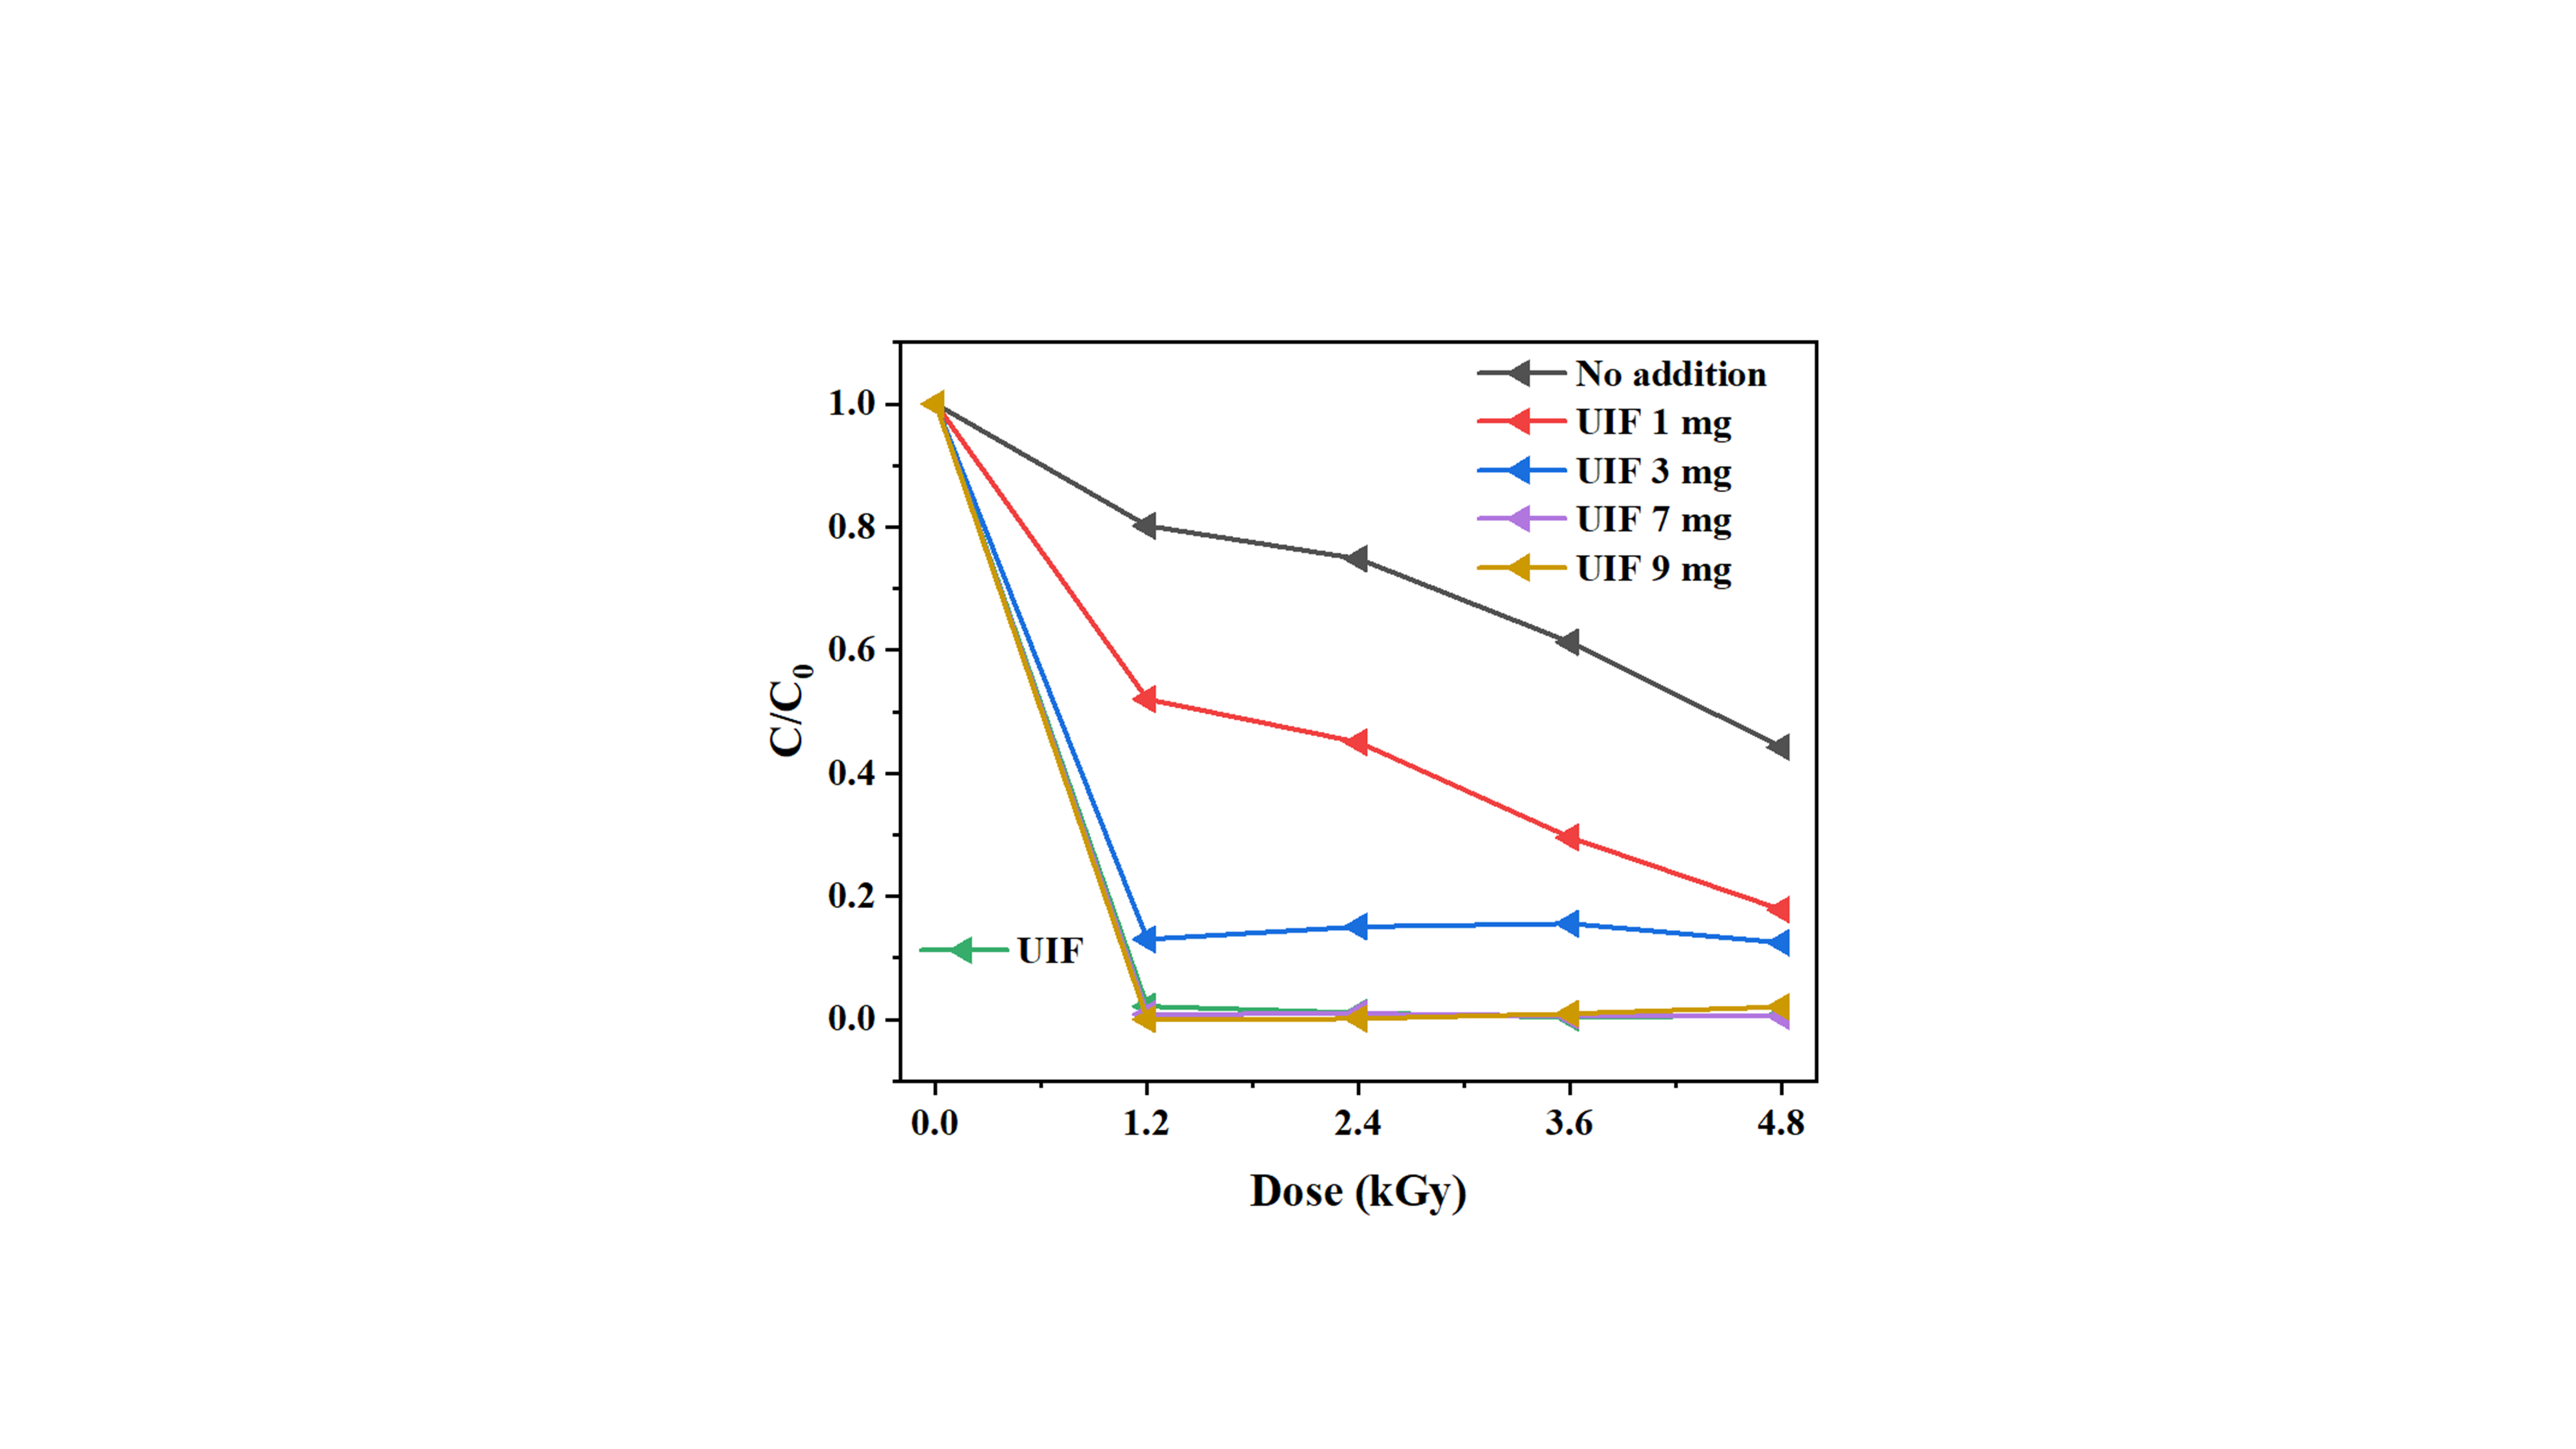


Figure S10. Comparison of catalyst concentration at different irradiation doses.


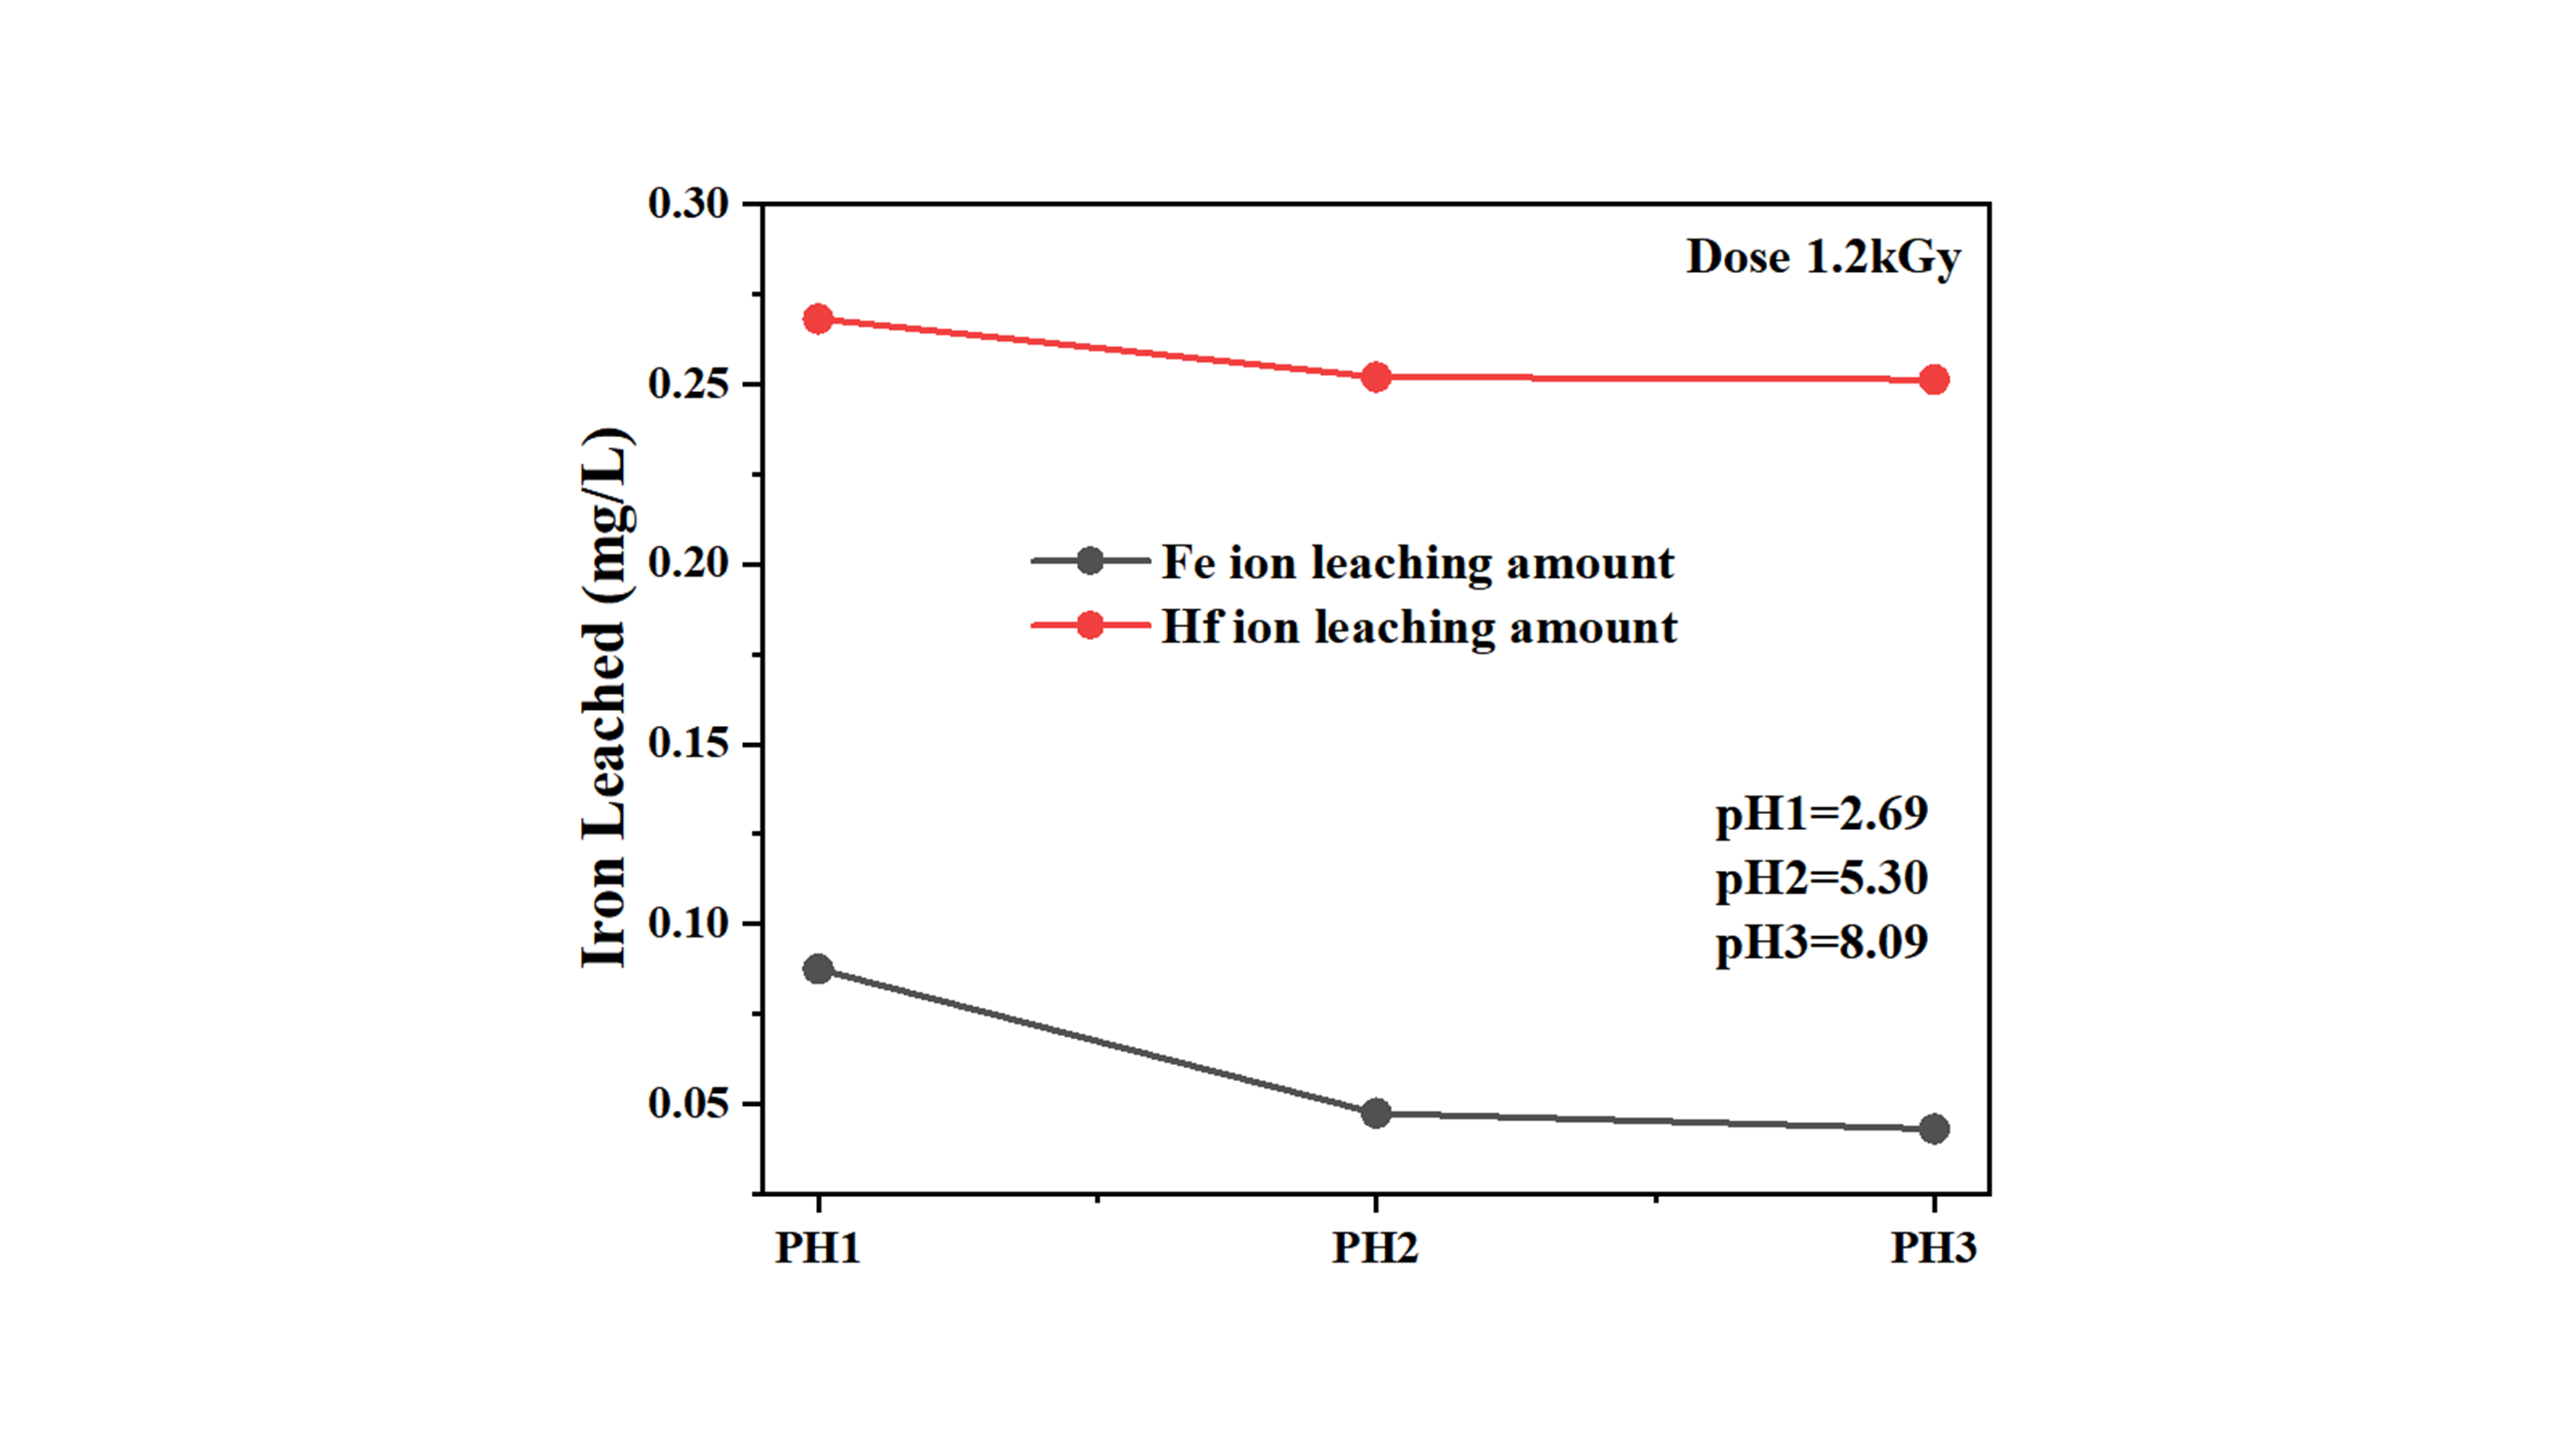


Figure S11. The amount of ion leaching by UIF materials under different pH conditions

8


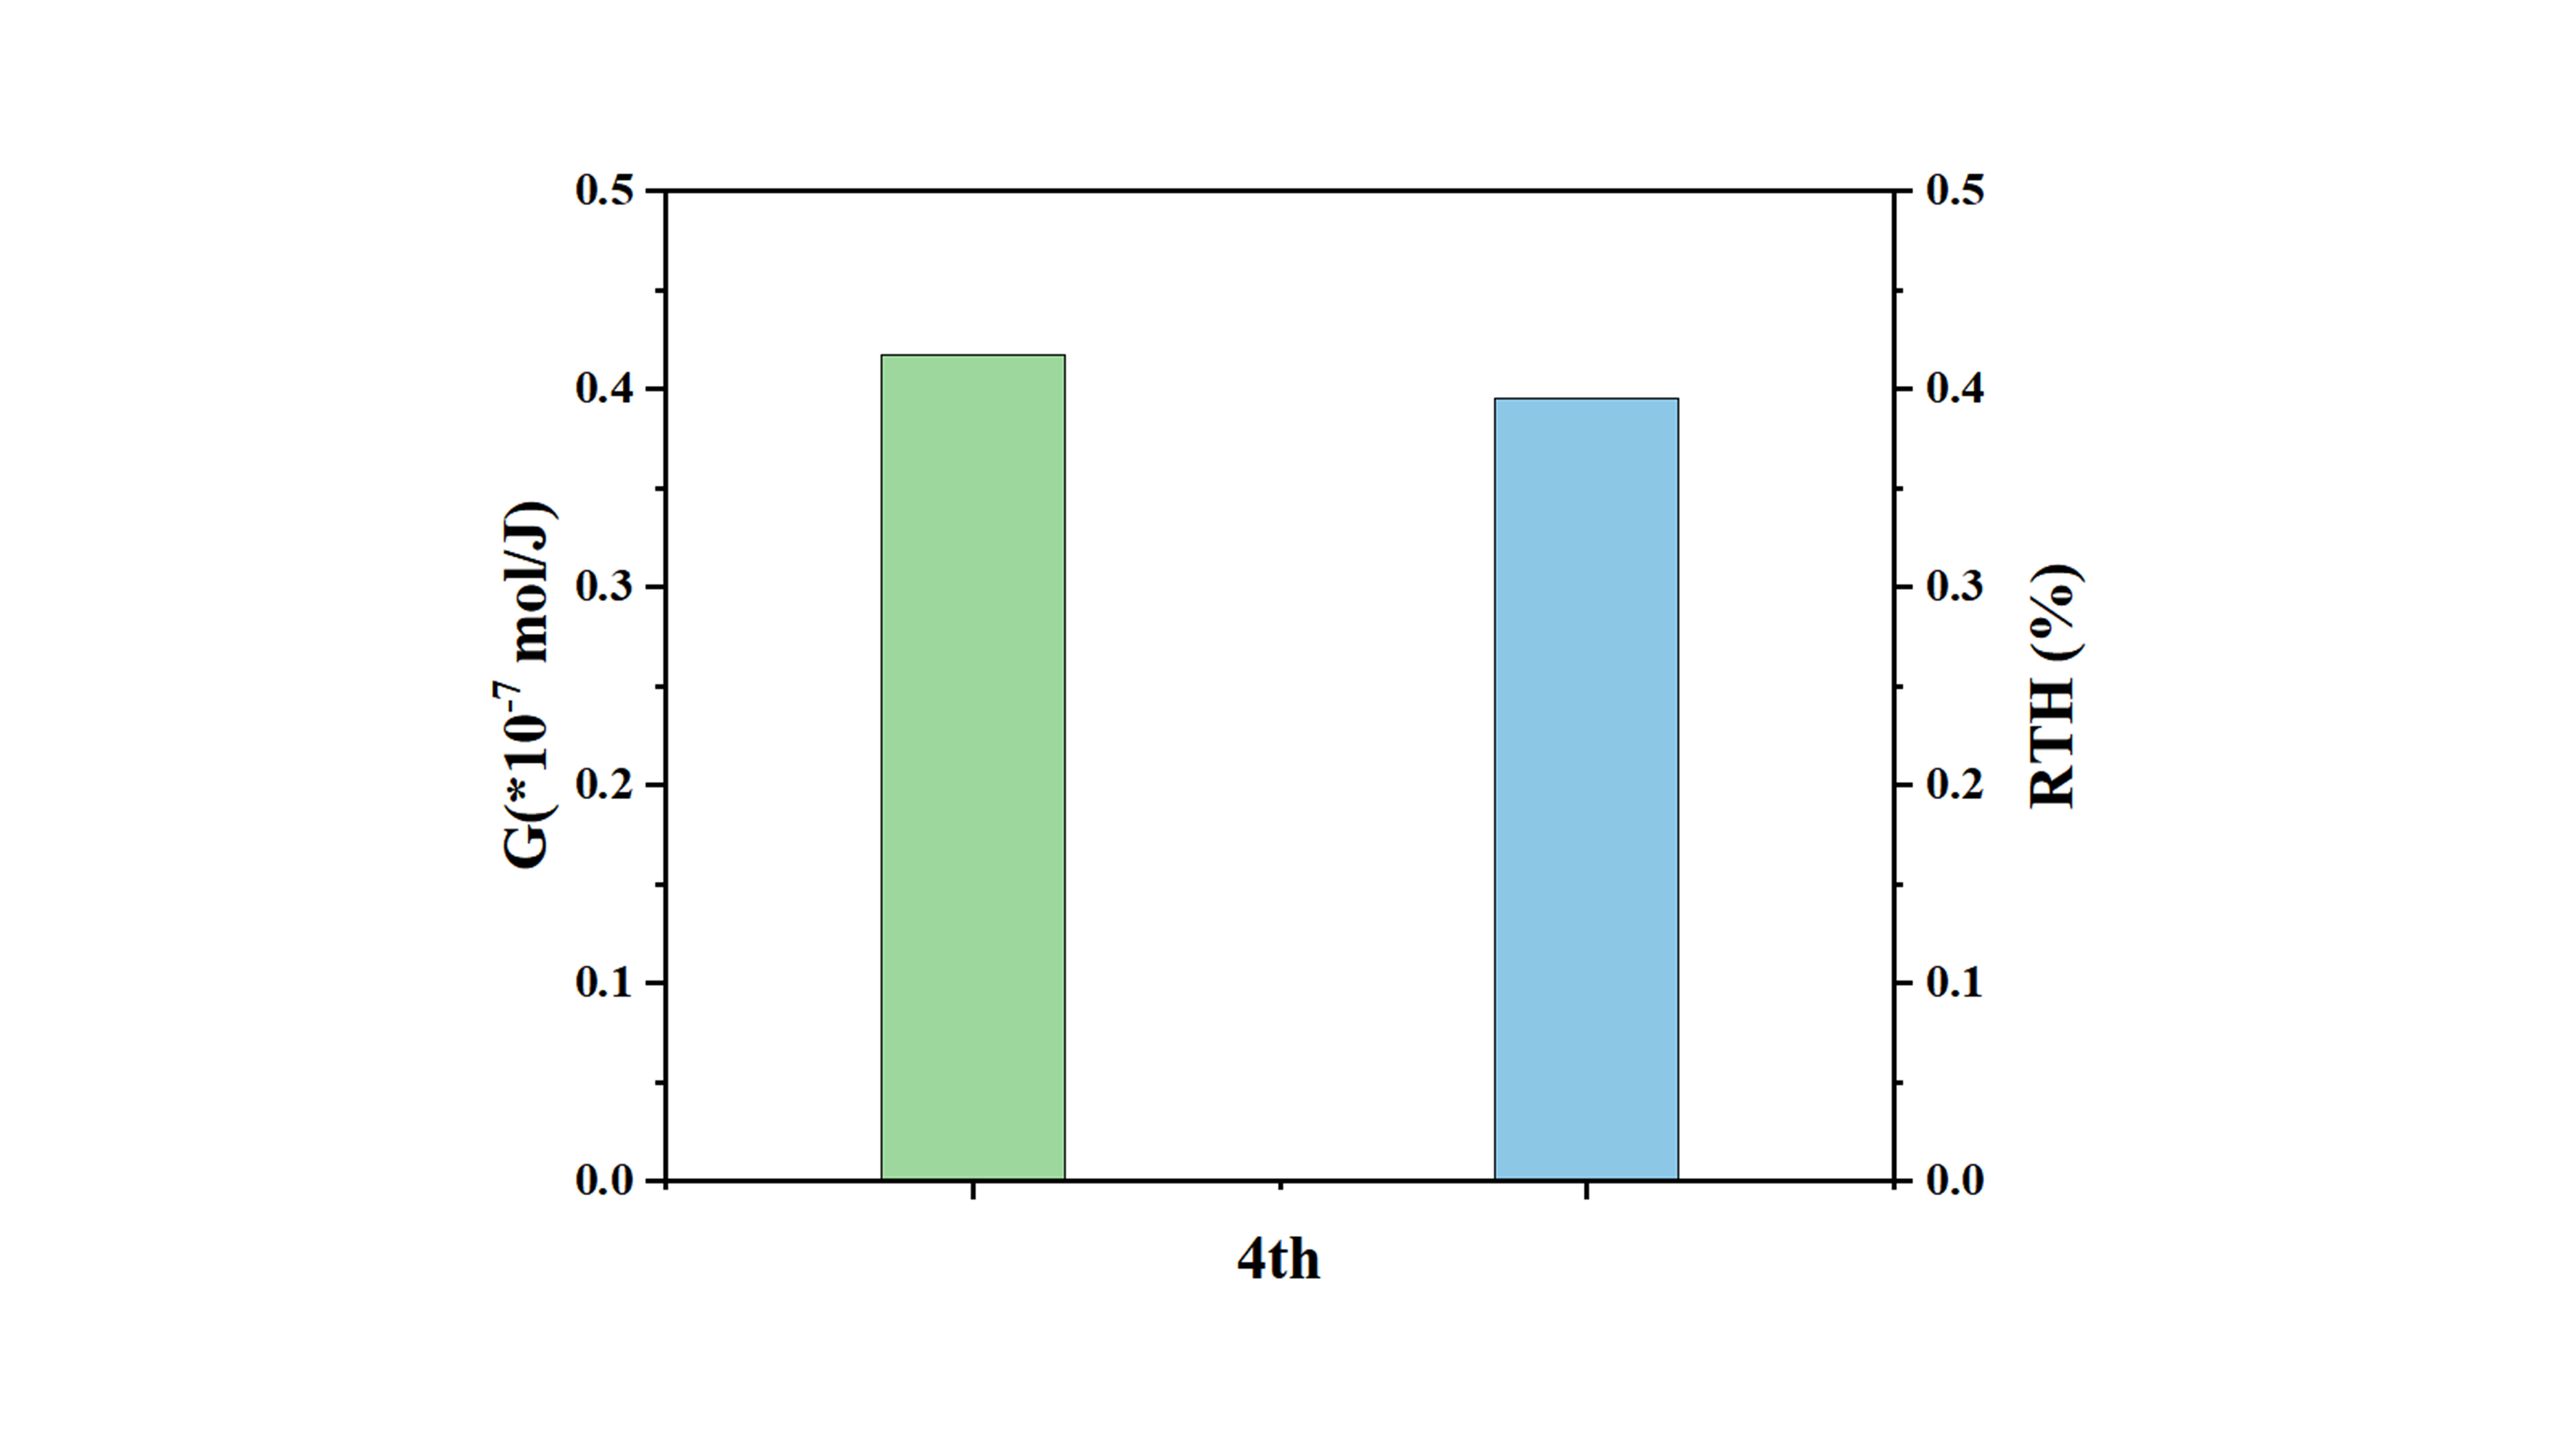


Figure S12. The G value of UIF and the RTH conversion rate in the four repeated irradiation recovery processes.

**
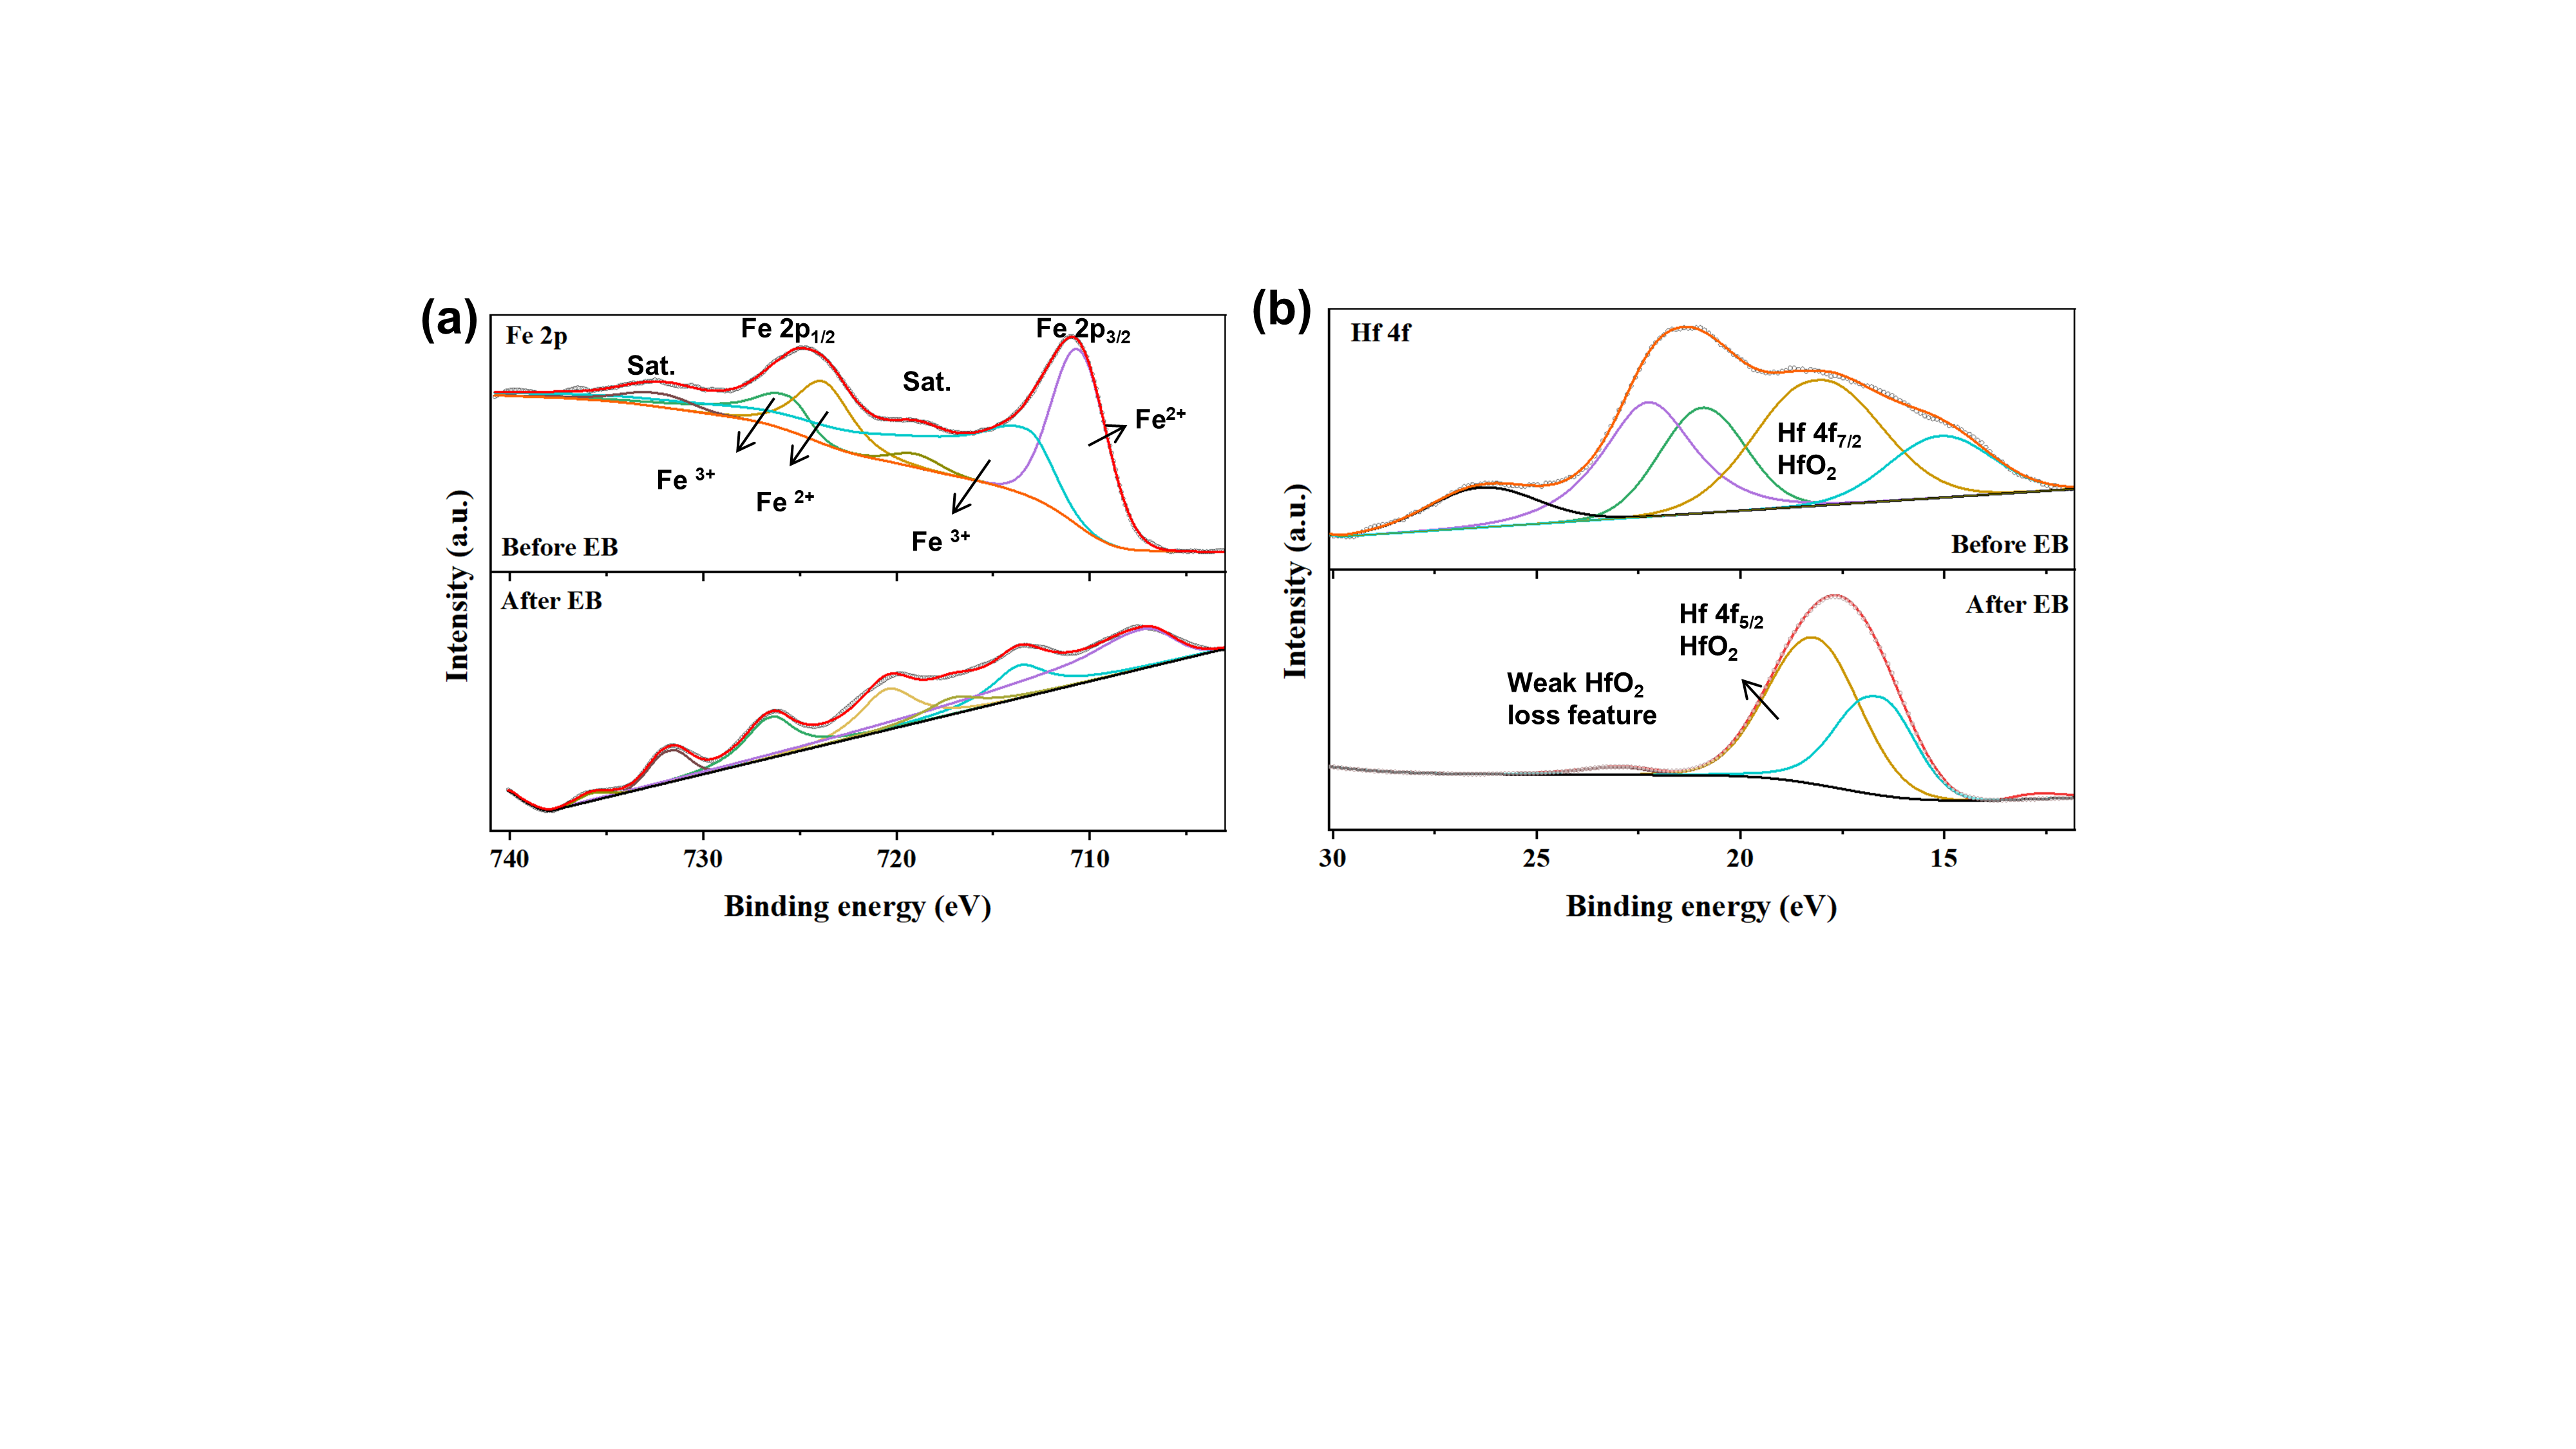
**

Figure S13. The XPS spectra of Hf and Fe of different materials before and after irradiation.

**Table:**

Table S1. State-of-the-art RTH values reported in the literature.

| Materials | Solution  Medium |  | Cat. wt% | RTH |
| --- | --- | --- | --- | --- |
| ZrO2[28] | Water | 0.3 | 20 | 0.7% |
| Fe3O4[28] | Water | 0.35 | 20 | 0.86% |
| NiFe2O4[28] | Water | 0.35 | 20 | 0.86% |
| Cr2O3[28] | Water | 0.4 | 20 | 1.0% |
| Y-type  zeolite[29] | Water | 0.4 | 20 | 0.98% |
| Mordenite -  type zeolite[29] | Water | 0.42 | 20 | 1.0% |

Cat. wt% : mass fraction of catalyst in aqueous solution. RTH (rays to hydrogen): the calculation method was quoted in equation (S3).

Table S2. The kinetics parameters of different catalysts.

|  | C0  (mg·L-1) | Qe（实际）  (mg·g-1) | Pseudo-first-order | | | Pseudo-second-order | | |
| --- | --- | --- | --- | --- | --- | --- | --- | --- |
| k1  (min-1) | qe1（理论）  (mg·g-1) | R2 | k2  (g·mg-1·min-1) | qe1（理论）  (mg·g-1) | R2 |
| UIF | 50 | 91.62 | -8.72E-4 | 8.30 | 0.17479 | 0.0021 | 92.08 | 0.99858 |
| UIO-66 | 50 | 71.44 | 6.423E-5 | 9.49 | -0.14086 | 0.022 | 70.92 | 0.98668 |
| Fe@C | 50 | 28.84 | -0.0011 | 22.89 | 0.77293 | 0.0021 | 34.69 | 0.76954 |

**Equation:**

(S1)

Where D represents the absorbed dose, C and Co (mg/L) are the contents of MO at D kGy and the initial state, and k is the degradation rate constant (1/kGy).

(S2)

(S3)

(S4)

(S5)

Where represents the adsorption capacity at time t (mg g-1), represents the adsorption amount when the adsorption reaches equilibrium (mg·g-1), and is the first-order and the second-order kinetic constant(min-1,g-1mg-1min-1).

(S6)

(S7)

(S8)

(S9)

(S10)

(S11)
